# 1 **Single-cell RNA-seq of the stromal vascular fraction of adipose tissue** 2 **reveals lineage-specific changes in cancer-related lymphedema**

3 **Xuanyu Liu** <sup>1,#</sup>, **Meng Yuan** <sup>1,#</sup>, **Qinqin Xiang** <sup>2</sup>, **Wen Chen** <sup>1</sup>, **Zhujun Li** <sup>3</sup>, **Jie Chen** <sup>3</sup>, **Jiuzuo Huang**  
4 **<sup>3</sup>, Nanze Yu <sup>3</sup>, Xiao Long <sup>3,\*</sup>, Zhou Zhou <sup>1,\*</sup>**

5 1 State Key Laboratory of Cardiovascular Disease, Beijing Key Laboratory for Molecular Diagnostics of  
6 Cardiovascular Diseases, Center of Laboratory Medicine, Fuwai Hospital, National Center for  
7 Cardiovascular Diseases, Chinese Academy of Medical Sciences and Peking Union Medical College,  
8 Beijing 100037, China;

9 2 Prenatal Diagnosis Center, Department of Obstetrics & Gynecologic, Key Laboratory of Birth Defects  
10 and Related Diseases of Women and Children (Sichuan University), Ministry of Education, West China  
11 Second University Hospital, Sichuan University, Chengdu 610041, China;

12 3 Division of Plastic Surgery, Peking Union Medical College Hospital, Beijing 100730, China;

13 # X. Liu and M. Y. contribute equally to this manuscript.

14 \* Correspondence author; email: Z.Z. ([zhouzhou@fuwaihospital.org](mailto:zhouzhou@fuwaihospital.org)) and X. Long  
15 ([pumclongxiao@126.com](mailto:pumclongxiao@126.com))

## 16 **Keywords**

17 lymphedema; stromal vascular fraction; adipose-derived stromal/stem/progenitor cell; macrophage;  
18 pathological mineralization; single-cell RNA-seq

## 19 **Abstract**

20 Lymphedema is a chronic tissue edema that frequently occurs following lymph node resection for cancer  
21 treatment, and is characterized by progressive swelling, chronic inflammation, excessive fibrosis and  
22 adipose deposition in the affected limbs. We still lack targeted medical therapies for this disease due to

23 the incomplete understanding of the mechanism underlying the pathogenesis. Here, we performed single-  
24 cell RNA-seq of 70,209 cells of the stromal vascular fraction (SVF) of subcutaneous adipose tissue from  
25 patients with cancer-related lymphedema and healthy donors. Unbiased clustering revealed 21 cell  
26 clusters, which were assigned to 10 cell lineages. One of the four ASC subpopulations, c3, was  
27 significantly expanded in lymphedema, which may be related to the fibrosis and pathologic mineralization  
28 of adipose tissues in lymphedema. Dysregulated pathways and genes of ASCs in lymphedema were  
29 identified through gene set enrichment analysis and differential regulatory network analysis, which reflect  
30 the pathophysiological changes in ASCs in lymphedema: enhanced fibrosis, mineralization and  
31 proliferation as well as compromised immunosuppression capacity. In addition, we characterized the  
32 three subpopulations of macrophages, and found that the adipose tissue of lymphedema displayed  
33 immunological dysfunction characterized by a striking depletion of anti-inflammatory macrophages, i.e.,  
34 *LYVE*<sup>+</sup> resident-like macrophages. Cell-cell communication analysis revealed a perivascular ligand-  
35 receptor interaction module among ASCs, macrophages and vascular endothelial cells in adipose tissue.  
36 Communication changes for ASCs in lymphedema were identified. For example, PDGFD-PDGFR  
37 complex interactions were significantly enhanced between a number of lineages and ASCs, reflecting the  
38 role of PDGFD signaling in the pathophysiological changes in ASCs. Finally, we mapped the previously  
39 reported candidate genes predisposing to cancer-related lymphedema to cell subpopulations in the SVF,  
40 and found that *GJC2*, the most likely causal gene was highly expressed in the lymphedema-associated  
41 ASC subpopulation c3. In summary, we provided the first comprehensive analysis of cellular  
42 heterogeneity, lineage-specific regulatory changes and intercellular communication alterations of the SVF  
43 in adipose tissues from cancer-related lymphedema at a single-cell resolution. The lymphedema-  
44 associated cell subpopulations and dysregulated pathways may serve as potential targets for medical  
45 therapies. Our large-scale dataset constitutes a valuable resource for further investigations of the  
46 mechanism of cancer-related lymphedema.

## 47 **Introduction**

48 Lymphedema is a chronic tissue edema that results from lymphatic drainage disorders due to intrinsic  
49 fault (primary lymphedema) or damage (secondary lymphedema) to the lymphatic system (Lawenda et

50 al., 2009). Secondary lymphedema is the most prevalent form and frequently occurs following lymph node  
51 resection for cancer treatment, i.e., cancer-related lymphedema (Shaitelman et al., 2015). Up to 20% of  
52 women develop this condition following treatment for breast cancer (DiSipio et al., 2013). Lymphedema  
53 is characterized by progressive swelling, chronic inflammation, excessive fibrosis and adipose deposition  
54 in the affected limbs (Zampell et al., 2012a). Lymphedema usually exerts a significant physical and  
55 psychological burden on cancer survivors and severely affects their quality of life; however, the clinical  
56 treatment remains palliative (Shaitelman et al., 2015). We still lack effective therapies, in particular,  
57 targeted medical therapies, for the treatment or prevention of this complication, which is partially due to  
58 the incomplete understanding of the cellular mechanism of pathogenesis.

59 Adipose tissue is not simply a container of fat, but an endocrine organ, which is composed of multiple  
60 types of cells, such as adipose-derived stromal/stem/progenitor cells (ASCs), adipocytes, vascular cells  
61 (e.g., vascular endothelial cells and pericytes) and immune cells (e.g., macrophages and lymphocytes)  
62 (Vijay et al., 2020). All nonadipocyte cells are known as the stromal vascular fraction (SVF), which can  
63 be isolated through enzymatic digestion (Ramakrishnan and Boyd, 2018). Lymphatic fluid stasis in the  
64 limbs of patients with lymphedema will ultimately result in increased subcutaneous adipose tissue volume  
65 and excess adipose deposition, which may lead to further deterioration of the lymphatic system (Mehrara  
66 and Greene, 2014). Previous studies have found significant alterations in the SVF of subcutaneous  
67 adipose tissue in lymphedema with regard to cellular composition, proliferation and differentiation capacity,  
68 which reflects the role of SVF changes in the pathophysiology of lymphedema (Aschen et al., 2012;  
69 Januszyk et al., 2013; Tashiro et al., 2017; Zampell et al., 2012b). However, previous studies generally  
70 rely on the expression of a limited number of marker genes and have focused on a few cell lineages. We  
71 still lack a comprehensive and accurate understanding of the alterations of adipose tissue in lymphedema.

72 Recent technical advances in single-cell RNA-seq have enabled the transcriptomes of tens of thousands  
73 of cells to be assayed at single-cell resolution (Zheng et al., 2017). Compared with the averaged  
74 expression of genes from a mixed cell population obtained by bulk RNA-seq, large-scale single-cell RNA-  
75 seq allows unbiased cellular heterogeneity dissection and regulatory network construction at an  
76 unprecedented scale and resolution (Kulkarni et al., 2019). Single-cell RNA-seq is therefore emerging as  
77 a powerful tool for understanding the cellular and molecular mechanisms of pathogenesis in a variety of  
78 diseases such as pulmonary fibrosis (Reyffman et al., 2019) and lupus nephritis (Der et al., 2019). Single-

79 cell RNA-seq has also been applied to dissect the heterogeneity of the SVF in mice (Burl et al., 2018;  
80 Schwalie et al., 2018) and humans (Vijay et al., 2020). However, to our knowledge, few studies have  
81 been performed to explore the alterations in the SVF under a diseased condition, for example,  
82 lymphedema, at a single-cell resolution.

83 In this study, we performed single-cell RNA-seq of 70,209 cells of the SVF of subcutaneous adipose  
84 tissue from patients with cancer-related lymphedema and healthy donors. We aimed to identify cell  
85 lineages or subpopulations associated with lymphedema, lineage-specific regulatory changes and  
86 intercellular communication alterations in adipose tissue from lymphedema.

## 87 **Results**

### 88 **Single-cell RNA-seq reveals cellular diversity and heterogeneity of the SVF of subcutaneous** 89 **adipose tissue in patients with cancer-related lymphedema.**

90 To unbiasedly dissect the cellular heterogeneity of the SVF of adipose tissue in healthy and diseased  
91 conditions (cancer-related lymphedema), we obtained subcutaneous adipose tissue specimens from the  
92 affected thighs of five patients with severe lymphoedema (stage III; the CASE group) following surgical  
93 intervention for cervical cancer. As a control group, liposuction specimens from the thighs of four healthy  
94 female donors were also collected (Figure 1A; Table S1). After SVF isolation, all the samples were  
95 subjected to single-cell transcriptomic sequencing. Following stringent quality filtering, we ultimately  
96 obtained transcriptomes of 70,209 cells (CASE: 41,274 cells; CTRL: 28,935 cells). Unbiased clustering  
97 revealed 21 clusters (Figure 1B). Based on hierarchical clustering (Figure 1C) and established lineage-  
98 specific marker genes (Figure 1D), we assigned these clusters to 10 cell lineages. The representative  
99 molecular signatures of these clusters are shown in Figure 1E and Table S2.

100 The ASC lineage (marked by *PDGFRA* and *DCN*) (Guerrero-Juarez et al., 2019), including c0, c1, c3 and  
101 c5, accounted for a large proportion (49.2%) of the SVF (Figure 1C), which is comparable with that (55%)  
102 reported previously (Vijay et al., 2020). A large and diverse population of immune cells (49.9%) were  
103 found, including both myeloid cells and lymphocytes. The dominant lineage of myeloid cells was  
104 macrophages (marked by *ITGAM* and *CD68*) (Singhal et al., 2019), which included three subpopulations,

105 i.e., c6, c8 and c11. Two other types of myeloid cells were mast cells (marked by *TPSB2* and *KIT*) (Vieira  
106 Braga et al., 2019) and dendritic cells (DCs). The DCs encompassed clusters of conventional dendritic  
107 cells (cDCs; c19; marked by *LY75*) and plasmacytoid dendritic cells (pDCs; c18 and c17; marked by  
108 *CLEC4C*) (Merad et al., 2013). The lymphocytes detected included T cells (c2, c4, and c12; marked by  
109 *CD3D* and *CD3G*) (Guo et al., 2018), B cells (c16; marked by *CD79A* and *IGHG2*) (Hu et al., 2017),  
110 natural killer (NK) cells (c7 and c10; marked by *KLRB1* and *KLRD1*) (Xu et al., 2011) and natural killer T  
111 (NKT) cells (c9 and c15; expressing both NK and T cell markers). Detailed analysis revealed that both c2  
112 and c12 belonged to CD4<sup>+</sup> helper T cells (marked by *CD4* and *IL7R*; Figure S1). Cluster c12 also exhibited  
113 expression of *CTLR4* and *FOXP3* (Figure S1), thus representing a cluster of regulatory T cells (Treg cells)  
114 (Li et al., 2015). Cluster c4 was a cluster of CD8<sup>+</sup> T cells, reflected by high expression of *CD8A* and *CD8B*  
115 (Figure S1). The NKT cluster c15 expressed high levels of proliferation markers such as *MKI67* and  
116 *TOP2A*, thus representing proliferative NKT cells, whereas the NKT cluster c9 belonged to  
117 nonproliferative NKT cells (Figure S1). In addition, we identified vascular cells including endothelial cells  
118 (c13; marked by *CDH5* and *PECAM1*) (Kalucka et al., 2020) and pericytes (c20; marked by *RGS5* and  
119 *CSPG4*) (Holm et al., 2018). Together, single-cell analysis reveals previously unrecognized cellular  
120 diversity and heterogeneity of the SVF of subcutaneous adipose tissue in lymphedema.

121 **Differential proportional analysis reveals significantly expanded or contracted cell lineages**  
122 **associated with cancer-related lymphedema.**

123 Cell lineages that greatly change in relative proportion are probably associated with the pathogenesis of  
124 the disease. Visualization of the cellular density revealed dramatic changes in the relative proportions of  
125 multiple lineages, including ASCs, macrophages and lymphocytes (Figure 2A). To determine whether the  
126 proportional change was expected by chance, we performed a permutation-based statistical test  
127 (differential proportion analysis; DPA) as described previously (Farbehi et al., 2019). As shown in Figure  
128 2B, the ASCs were significantly expanded (Bonferroni-corrected p-value < 0.01), which suggests  
129 enhanced proliferation or differentiation of ASCs in lymphedema. Indeed, we observed significantly higher  
130 cycling scores for ASCs in CASE versus CTRL (Wilcoxon rank sum test p-value = 4.916E-09; Figure S2).  
131 Strikingly, lymphocyte lineages (T cells, NK and NKT cells) were significantly expanded, whereas the  
132 myeloid lineages (macrophages and DCs) were significantly contracted (Bonferroni-corrected p-value <

133 0.05; Figure 2B). This result may reflect enhanced adaptive immunity and exhausted innate immunity at  
134 this severe stage of lymphedema. Further analysis at the cluster level revealed significantly expanded  
135 subpopulations, including c2 CD4<sup>+</sup> T cells; c3 ASCs, c7 NK cells and c9 NKT cells, reflecting a strong  
136 association of these subpopulations with pathogenesis (Figure 2C and 2D). The three macrophage  
137 subpopulations, especially cluster c6, were greatly contracted. Given the results above and the relatively  
138 large cellular proportion, our study focused on the ASC and macrophage lineages, which may play  
139 dominant role in the pathogenesis and could potentially serve as cellular targets for medical intervention.

#### 140 **Heterogeneity of ASCs in the SVF of adipose tissue unraveled by single-cell analysis.**

141 We examined the expression of marker genes normally used for identifying freshly isolated or cultured  
142 ASCs (Figure 3A). Consistent with our knowledge (Suga et al., 2009), *CD34*, a marker for freshly isolated  
143 ASCs in the SVF, is highly expressed in all ASC subpopulations. The ASCs expressed positive markers  
144 for the definition of cultured ASCs (e.g., *CD105*, *CD73*, *CD90*, *CD59*, *CD44* and *CD29*) and generally  
145 lacked expression of negative markers (e.g., *CD45*, *CD14*, *CD11b*, *CD19* and *CD79A*) (Dominici et al.,  
146 2006; Gimble et al., 2007). Notably, we found that some ASCs, particularly in cluster c5, expressed MHC  
147 class II genes (e.g., *HLA-DRA*, *HLA-DRB1* and *HLA-DRB5*), suggesting that these cells had antigen-  
148 presenting functions. This finding agrees with the notion that antigen-presenting functions could be  
149 induced in inflammatory or diseased states for ASCs, albeit the fact that they are not natural antigen-  
150 presenting cells (Liu et al., 2017). Next, we found that the four subpopulations had distinct expression  
151 profiles (Figure 3B; Table S3). Cluster c0 expressed high levels of adipose stem cell or preadipocyte  
152 markers such as *CXCL14*, *APOD*, *APOE*, *MGP* and *WISP2* (Vijay et al., 2020). The gene signature of c0  
153 was enriched with the Gene Ontology (GO) term “positive regulation of hemostasis” (representative  
154 genes: *CD36*, *F3* and *SELENOP*; Figure 3C). In line with these results, subpopulation-specific regulon  
155 analysis using SCENIC (Aibar et al., 2017) identified *PPARG* and *CEBPA*, the known master TFs in  
156 adipogenesis (Cristancho and Lazar, 2011), as c0-specific key regulators (Figure 3D). Notably, c3, a  
157 lymphedema-associated ASC subpopulation based on the DPA above (Figure 2C), showed high  
158 expression of genes specifically expressed by chondrocytes (e.g., *PRG4*) (Kozhemyakina et al., 2015),  
159 and its molecular signature was enriched with GO terms such as “collagen fibril organization”, “bone  
160 mineralization” and “mesenchymal cell differentiation” (Figure 3C). As such, c3 may represent progenitor

161 cells closely associated with the fibrosis and pathologic mineralization of adipose tissues in lymphedema.  
162 C3-specific regulators such as *KLF13*, *KLF2* and *JUND* could serve as potential targets for medical  
163 intervention (Figure 3D). Cluster c1 was phenotypically close to c3, and its signature was also enriched  
164 with extracellular matrix remodeling pathways such as “collagen fibril organization”. Cluster c5 was an  
165 ASC subpopulation displaying a unique pattern with a high expression of metallothionein genes such as  
166 *MT1X*, *MT2A*, *MT1E*, *MT1G*, *MT1M* and *MT1A* (Figure 3B). Given that metallothionein proteins mainly  
167 play roles in protection against damage associated with heavy metal toxicity, endoplasmic reticulum  
168 stress or oxidative stress (Ruttkey-Nedecky et al., 2013; Yang et al., 2015), c5 may represent a stress-  
169 responsive subpopulation. Together, we characterized four previously unrecognized subpopulations of  
170 ASCs in the SVF of adipose tissue, and found that the lymphedema-associated subpopulation c3 may  
171 be related to the fibrosis and pathologic mineralization of adipose tissues in lymphedema.

#### 172 **Dysregulated pathways and genes in the ASCs of cancer-related lymphedema.**

173 Single-cell RNA-seq allows unbiased analysis of lineage-specific transcriptomic changes in diseased  
174 conditions without cell sorting. We next explored the dysregulated pathways through gene set enrichment  
175 analysis (GSEA), which facilitates biological interpretation by robustly detecting concordant differences  
176 at the gene set or pathway level (Emmert-Streib and Glazko, 2011). Extracellular matrix-related pathways  
177 such as “extracellular matrix organization” and “collagen formation” were significantly upregulated (GSEA;  
178 FDR q-value < 0.05; Figure 4A; Table S5), which is in line with the fibrosis of adipose tissue in  
179 lymphedema. Glycosylation is a common modification of proteins and lipids, which has been implicated  
180 in physiological (e.g., cell differentiation) and pathophysiological states (e.g., autoimmunity and chronic  
181 inflammation) (Reily et al., 2019). Strikingly, glycosylation-related pathways such as “O-linked  
182 glycosylation” and “diseases of glycosylation” were significantly upregulated, which suggests that  
183 increased glycosylation or altered glycosylation patterns in ASCs may contribute to pathogenesis. In  
184 addition, “SUMOylation of DNA damage response and repair proteins” was upregulated, reflecting DNA  
185 damage induced by chronic inflammation (Ioannidou et al., 2016). Compared with the healthy state, ASCs  
186 in lymphedema displayed downregulated protein translation, energy metabolism and response to  
187 endoplasmic reticulum stress (Figure 4A), reflecting impaired cellular functions at the late stage of  
188 lymphedema. Notably, interleukin 10 (IL10) signaling was downregulated in ASCs from lymphedema.

189 Although the role of IL10 signaling has seldom been discussed in nonimmune cells as targets  
190 (Rajbhandari et al., 2018), the downregulation of the expression of *IL10* (Table S5), an important anti-  
191 inflammatory cytokine secreted by ASCs, may suggest a reduced immunosuppression capability of ASCs  
192 in lymphedema. Unexpectedly, we found decreased adipogenesis for ASCs in lymphedema, as  
193 evidenced by the significantly reduced expression of *PPARG* and *CEBPA* (Figure S3A and S3B), the  
194 master regulators in adipogenesis (Januszyk et al., 2013), as well as significantly decreased  
195 adipogenesis score (Wilcoxon rank sum test p-value < 2.2e-16; Figure S3C). In addition, we found  
196 significantly increased osteogenesis of ASCs in lymphedema (Figure S3D), which reflects aberrant  
197 differentiation in diseased conditions.

198 Next, we built gene regulatory networks from single-cell data using a novel method implemented in  
199 bigScale2 (Iacono et al., 2019), which allows us to quantify the biological importance of genes and find  
200 dysregulated genes in diseased conditions. Figure 4B shows the regulatory networks constructed for  
201 ASCs in healthy (upper panel) and diseased conditions (lower panel). Comparative analysis between the  
202 two networks revealed a list of genes that were greatly increased in degree centrality (the number of  
203 edges connected to a given node; Figure 4B; Table S6) in lymphedema, reflecting their potential roles in  
204 the pathogenesis. These genes were mainly involved in bone mineralization, positive regulation of protein  
205 kinase B signaling, and regulation of mesenchymal cell proliferation and differentiation (Figure 4C).  
206 Notably, *CLEC3B*, encoding a protein implicated in the mineralization process, ranked at the top of the  
207 list based on changes in degree centrality (Figure 4D). The expression of *CLEC3B* was upregulated in  
208 CASE compared to CTRL (Figure 4D) and was especially high in the lymphedema-associated  
209 subpopulation c3 (Table S3), thus highlighting the role of pathologic mineralization of adipose tissues in  
210 the pathogenesis of lymphedema. Similarly, the expression of *ZNF385A*, a transcription factor implicated  
211 in fibroblast proliferation and differentiation, was also upregulated in CASE (Figure 4D) and was  
212 especially high in the lymphedema-associated subpopulation c3.

213 Together, our results highlight the pathological changes in ASCs, which displayed enhanced fibrosis,  
214 mineralization and proliferation as well as compromised immunosuppression capacity, in the severe stage  
215 of lymphedema.



216 **Adipose tissue of lymphedema displays immunological dysfunction characterized by a striking**  
217 **depletion of anti-inflammatory macrophages.**

218 Tissue-resident or infiltrated macrophages are phenotypically heterogeneous in a tissue/state-dependent  
219 manner (Varol et al., 2015). We next explored the phenotypic differences among the three lymphedema-  
220 associated macrophage subpopulations (c6, c8 and c11). These subpopulations displayed distinct  
221 expression profiles (Figure 5A; Table S7). Compared with other subpopulations, c6 showed high  
222 expression of *LYVE1*, a marker gene associated with tissue-resident macrophages (Lim et al., 2018). It  
223 also displayed high expression of markers for M2-polarized (alternatively activated) macrophages,  
224 including *RNASE1*, *SELENOP*, *MRC1* and *CD163* (Figure 5B), which harbor an antiinflammatory  
225 phenotype (Varol et al., 2015). Thus, the *LYVE1*<sup>+</sup> c6 cluster represented a resident-like macrophage  
226 subpopulation with an M2 phenotype. Compared with the others, cluster c8 expressed higher levels of  
227 *IL1B*, a pro-inflammatory cytokine, and markers for M1-polarized (classically activated) macrophages  
228 such as *FCGR1A*, *TNF* and *FPR2* (Jablonski et al., 2015). The *IL1B*<sup>high</sup> cluster c8 thus represented a  
229 proinflammatory macrophage subpopulation with an M1 phenotype. Cluster c11 expressed high levels of  
230 *CD1C*, encoding an antigen-presenting molecule, and MHC class II genes (e.g., *HLA-DQA1*, *HLA-DPB1*  
231 and *HLA-DPA1*; Figure 5A). It expressed both M1 and M2 markers, e.g., *CD86* and *MRC1*, respectively  
232 (Figure 5B). The molecular signature of c11 was enriched with antigen presentation-related terms such  
233 as “antigen processing and presentation of exogenous antigen” (Figure 5C). These results suggest that  
234 the *CD1C*<sup>high</sup> cluster c11 represented a specialized antigen-presenting macrophage subpopulation.  
235 Furthermore, we identified subpopulation-specific regulons through SCENIC analysis (Figure 5D), which  
236 could serve as potential targets for medical intervention, for example, targeting the key regulators of the  
237 proinflammatory macrophage subpopulation c8 (e.g., *CEBPB*, *FOSL2*, *STAT1* and *IRF7*).

238 As mentioned above, the macrophage lineage, especially subpopulation c6, was dramatically reduced in  
239 lymphedema (Figure 2B and 2C). We calculated the ratio of c6/c8, as a proxy of the ratio of M1/M2, and  
240 found that it was greatly decreased in lymphedema (0.76 in CASE versus 2.03 in CTRL). Together, these  
241 results suggest that immunological dysfunction characterized by a striking depletion of antiinflammatory  
242 macrophages occurred in the adipose tissue of lymphedema. Transplantation of *LYVE1*<sup>+</sup> macrophages  
243 could thus potentially serve as a cellular therapy for cancer-related lymphedema.

244 **Cell-cell communication analysis reveals a perivascular ligand-receptor interaction module and**  
245 **communication changes for ASCs in cancer-related lymphedema.**

246 The single-cell dataset provided us with a unique chance to analyze cell-cell communication mediated by  
247 receptor-ligand interactions. To define the cell-cell communication landscape and uncover its alterations  
248 in diseased conditions, we performed analysis using CellPhoneDB 2.0 (Efremova et al., 2019), which  
249 contains a curated repository of ligand-receptor interactions and a statistical framework for predicting  
250 enriched interactions between two cell types from single-cell transcriptomics data. Strikingly, we identified  
251 a densely connected communication network among macrophages, ASCs and vascular endothelial cells  
252 in both conditions (Figure 6A), which is concordant with our knowledge that macrophages, especially  
253 *LYVE1*+ macrophages (Lim et al., 2018), and ASCs (Baer, 2014) are spatially associated with the blood  
254 vasculature. In line with this, we found that ASCs were the predominant source of the macrophage colony  
255 stimulating factor CSF1 (Figure S4A), which is critical for the survival of tissue macrophages through the  
256 activation of the receptor CSF1R (Hume and MacDonald, 2012). The expression of *CSF1* in ASCs was  
257 significantly higher in lymphedema than in healthy controls (Figure S4B), reflecting enhanced signals  
258 broadcast by ASCs in the diseased state. We therefore identified a perivascular ligand-receptor signal  
259 module. Compared with the healthy controls, the total number of interactions for almost all lineages  
260 increased in lymphedema (Figure 6A), reflecting enhanced intercellular communications in diseased  
261 conditions. Notably, the most abundant interactions in the network occurred between ASCs and  
262 macrophages in healthy controls, whereas the most abundant interactions occurred between ASCs and  
263 vascular endothelial cells in lymphedema (Figure 6B). Furthermore, we identified the ligand-receptor pairs  
264 showing significant changes in specificity between any one of the non-ASC lineages and ASCs in  
265 diseased versus healthy conditions (ASCs express receptors and receive ligand signals from other  
266 lineages; Figure 6C; Table S9). Notably, PDGFD-PDGFR complex interactions were significantly  
267 enhanced between a number of lineages (vascular endothelial cells, mast cells, NKT cells and pericytes)  
268 and ASCs in lymphedema. Increased secretion of PDGFD or enhanced PDGFD signaling has been  
269 associated with aberrant proliferation and differentiation of mesenchymal cells in a number of diseases  
270 such as fibrosis and cancer (Folestad et al., 2018; Wang et al., 2009). Our results suggest that PDGFD  
271 signaling may contribute to the enhanced fibrosis and proliferation of ASCs in lymphedema. In addition,  
272 we also explored the alterations in ligand signals broadcast by ASCs (Figure 6D). Notably, a number of

273 chemokine signals, including CXCL8, CXCL12 and CCL2, broadcast by ASCs were significantly altered.  
274 For example, CXCL12-ACKR3 interactions between ASCs and BCs or DCs become significantly more  
275 specific in lymphedema than in healthy conditions (permutation test  $p$ -value  $< 0.05$ ). The  
276 CXCL12/CXCR4/ACKR3 axis has been considered a potential therapeutic target for a wide variety of  
277 inflammatory diseases, not only by interfering with leukocyte recruitment but also by modulating immune  
278 responses (García-Cuesta et al., 2019). Together, the intercellular communication analysis revealed a  
279 perivascular signal module in adipose tissue and identified ligand-receptor interaction changes for ASCs  
280 in lymphedema, which could serve as potential targets for medical intervention.

### 281 **Mapping the previously reported candidate genes predisposing to cancer-related lymphedema to** 282 **cell subpopulations in the SVF.**

283 Genetic susceptibility may partially explain the development of secondary lymphedema in cancer  
284 survivors (Newman et al., 2012). The single-cell RNA-seq dataset provided us an unprecedented chance to  
285 map the previously reported 18 candidate genes predisposing to cancer-related lymphedema (Visser et  
286 al., 2019) to cell subpopulations in the SVF. As shown in Figure 7, most predisposing genes were highly  
287 expressed in a specific cell subpopulation, including *HGF*, *MET*, *GJC2*, *IL1A*, *IL4*, *IL6*, *IL10*, *IL13*, *NRP2*,  
288 *VCAM1*, *FOXC2*, *KDR*, *FLT4* and *RORC*. Notably, *GJC2*, the most likely causal gene (Visser et al., 2019),  
289 was highly expressed in the lymphedema-associated ASC subpopulation c3. The expression of four  
290 candidate genes, including *MET*, *KDR*, *FLT4* and *FOXC2*, was highly specific in vascular endothelial cells  
291 (c13) or pericytes (c20), reflecting the role of vascular cells in the pathogenesis. Together, our results will  
292 help elucidate the cellular and molecular mechanisms underlying the pathogenesis of cancer-related  
293 lymphedema.

## 294 **Discussion**

295 Understanding the cellular heterogeneity and regulatory changes of tissues in diseased conditions is  
296 fundamental to successful medical therapy development. Here, we performed single-cell RNA-seq of  
297 70,209 cells of the SVF of subcutaneous adipose tissue from patients with cancer-related lymphedema  
298 and healthy donors. Unbiased clustering revealed 21 cell clusters, which were assigned to 10 cell

299 lineages. One of the four ASC subpopulations, c3, was significantly expanded in lymphedema. Functional  
300 analysis revealed that this lymphedema-associated ASC subpopulation may be related to the fibrosis and  
301 pathologic mineralization of adipose tissues in lymphedema. We also identified c3-specific regulators,  
302 such as *KLF13*, *KLF2* and *JUND*, which could serve as potential targets for medical intervention.  
303 Dysregulated pathways and genes of ASCs in lymphedema were identified through GSEA and differential  
304 regulatory network analysis, which reflect the pathophysiological changes in ASCs in lymphedema:  
305 enhanced fibrosis, mineralization and proliferation as well as compromised immunosuppression capacity.  
306 In addition, we characterized the three subpopulations of macrophages, and found that the adipose tissue  
307 of lymphedema displayed immunological dysfunction characterized by a striking depletion of anti-  
308 inflammatory macrophages, i.e., *LYVE*<sup>+</sup> resident-like macrophages. Cell-cell communication analysis  
309 revealed a perivascular ligand-receptor interaction module among ASCs, macrophages and vascular  
310 endothelial cells in adipose tissue. Finally, we mapped the previously reported candidate genes  
311 predisposing to cancer-related lymphedema to cell subpopulations in SVF.

312 Lymphedema is characterized by excess adipose deposition in the affected limbs (Mehrara and Greene,  
313 2014); however, the underlying mechanism remains elusive. Previous studies suggested enhanced  
314 adipogenesis, i.e., the differentiation of adipocytes from ASCs in mouse models (Aschen et al., 2012) and  
315 human patients (Januszyk et al., 2013), based on a limited number of marker genes. In contrast, our  
316 large-scale single-cell analysis did not find any significantly upregulated pathways associated with  
317 adipogenesis. Instead, we found that ASCs from lymphedema may have decreased adipogenesis (Figure  
318 S3) and enhanced proliferation ability (Figure S2). The enhanced proliferation of ASCs from lymphedema  
319 is consistent with the findings of a study based on bulk RNA-seq (Xiang et al., 2020). Histological  
320 evidence has shown that hypertrophic (cell enlargement) adipocytes are frequently observed, especially  
321 in the severe stages of lymphoedema (Tashiro et al., 2017). Therefore, we think that the excess adipose  
322 deposition may be mostly attributed to the enhanced proliferation ability of ASCs and cell enlargement of  
323 adipocytes at least in the severe stage of lymphoedema.

324 Stage III lymphedema, also known as lymphostatic elephantiasis, is a severe condition in which the tissue  
325 becomes extremely swollen, thickened and fibrotic (hardened) (Lawenda et al., 2009). Concordant with  
326 the enhanced fibrosis, we found that extracellular matrix-related pathways, such as “extracellular matrix  
327 organization” and “collagen formation”, were significantly upregulated in ASCs from lymphedema (Figure

328 4A). In addition, differential regulatory network analysis revealed that the genes involved in the bone  
329 mineralization process, e.g., *CLEC3B*, ranked at the top based on the changes in degree centrality  
330 (Figure 4D). We also found significantly increased osteogenesis scores based on a set of osteogenesis-  
331 related genes in ASCs from lymphedema (Figure S3D). Furthermore, we pinpointed the ASC  
332 subpopulation closely associated with lymphedema, i.e., c3, which was significantly expanded in  
333 lymphedema. The molecular signature of this subpopulation was enriched with pathways such as  
334 “collagen fibril organization” and “bone mineralization” (Figure 3C), suggesting that this subpopulation  
335 was related to both the fibrosis and pathologic mineralization of adipose tissues in lymphedema.  
336 Altogether, our results indicated that the hardened tissue at the severe stage of lymphoedema may not  
337 only be attributed to fibrosis, but also to pathologic mineralization of adipose tissues, which has not been  
338 recognized before. Pathological mineralization occurs in nearly all soft tissues and is associated with  
339 diverse human diseases such as cancer and atherosclerosis, but is sometimes overlooked (Tsolaki and  
340 Bertazzo, 2019). Our study highlights the aberrant differentiation or pathological mineralization of ASCs  
341 in lymphoedema, which may serve as a novel angle for treatment.

342 We found a striking depletion of antiinflammatory macrophages, i.e., the c6 *LYVE1*<sup>+</sup> resident-like  
343 subpopulation, in the adipose tissue of lymphedema (Figure 2C; Figure4B). It has been reported that  
344 *LYVE1*<sup>+</sup> macrophages contribute to the homeostasis of the aorta through the control of collagen  
345 deposition by smooth muscle cells, thus preventing arterial stiffness (Lim et al., 2018). In addition, our  
346 analysis revealed a perivascular ligand-receptor interaction module among ASCs, macrophages and  
347 vascular endothelial cells in adipose tissue (Figure 6), and found that ASCs were the predominant source  
348 of the macrophage colony stimulating factor *CSF1* (Figure S4A). These results reflect the close  
349 relationship between macrophages and ASCs in adipose tissue. The depletion of macrophages may  
350 contribute to the pathological changes in ASCs in lymphedema. Previous studies have proven that  
351 targeting immune cell subpopulations, such as CD4<sup>+</sup> helper T cells (Zampell et al., 2012a), was effective  
352 for alleviating the effects of lymphedema. We therefore propose that transplantation of *LYVE*<sup>+</sup> resident-  
353 like anti-inflammatory macrophages could serve as a cellular therapy for cancer-related lymphedema.  
354 Since the expression of *CSF1* in ASCs was even significantly higher in lymphedema than in healthy  
355 controls (Figure S4B), we reason that the mechanism underlying the depletion of macrophages,  
356 especially for the *LYVE1*<sup>+</sup> macrophages, may not be due to pathological changes in ASCs. However, the

357 precise mechanism remains to be explored.

358 In conclusion, we provided the first comprehensive analysis of cellular heterogeneity, lineage-specific  
359 regulatory changes, and intercellular communications of the SVF in adipose tissues from cancer-related  
360 lymphedema at a single-cell resolution. Our study revealed lymphedema-associated cell subpopulations  
361 and dysregulated pathways in ASCs, as well as a strong depletion of *LYVE*<sup>+</sup> anti-inflammatory  
362 macrophage in lymphedema, which could serve as potential targets for medical therapies. Our large-  
363 scale dataset constitutes a valuable resource for further investigations of the mechanism of cancer-  
364 related lymphedema.

## 365 **Methods**

### 366 **Ethics approval**

367 All human patient recruitments and tissue sampling procedures complied with the ethics regulations  
368 approved by Peking Union Medical College Hospital. Each subject provided written informed consent.

### 369 **Specimen preparation and SVF Isolation**

370 Adipose tissue specimens were obtained from the affected thighs of five female patients with secondary  
371 lymphoedema (stage III) following surgical intervention for cervical cancer. As a control group, liposuction  
372 specimens from the thighs of four healthy female donors were collected during surgery for cosmetic  
373 purposes. All fresh specimens were subjected to SVF isolation. Briefly, each specimen was washed  
374 several times with Hank's balanced salt solution (HBSS). Then, it was digested with 0.15% collagenase  
375 supplied with 4% penicillin streptomycin solution (P/S) at 37°C for 30 minutes. Subsequently, high-  
376 glucose Dulbecco's Modified Eagle's Medium (DMEM) with 10% fetal bovine serum (FBS) was added,  
377 and the sample was centrifuged at 4°C for 10 minutes. The pellet was resuspended in high-glucose  
378 DMEM with 10% FBS, filtered through a 100- $\mu$ m strainer, and then centrifuged at 4 °C for 5 minutes. The  
379 obtained cell suspensions were resuspended in HBSS, and red blood cell lysis buffer was added. Then,  
380 it was centrifuged again, resuspended in HBSS with 0.04% bovine serum albumin (BSA) and filtered  
381 through a 40- $\mu$ m strainer. Finally, the cells were centrifuged and resuspended in Dulbecco's Phosphate

382 Buffered Saline (DPBS).

### 383 **Single-cell RNA-seq library preparation and sequencing**

384 Single-cell Gel Beads-in-Emulsion (GEM) generation, barcoding, post GEM-RT cleanup, cDNA  
385 amplification and cDNA library construction were performed using Chromium Single Cell 3' Reagent Kit  
386 v3 chemistry (10X Genomics, USA) following the manufacturer's protocol. The resulting libraries were  
387 sequenced on a NovaSeq 6000 system (Illumina, USA).

### 388 **Sample demultiplexing, barcode processing and UMI counting**

389 The official software Cell Ranger v3.0.2 (<https://support.10xgenomics.com>) was applied for sample  
390 demultiplexing, barcode processing and unique molecular identifier (UMI) counting. Briefly, the raw base  
391 call files generated by the sequencers were demultiplexed into reads in FASTQ format using the  
392 "cellranger mkfastq" pipeline. Then, the reads were processed using the "cellranger count" pipeline to  
393 generate a gene-barcode matrix for each library. During this step, the reads were aligned to the mouse  
394 human reference genome (version: GRCh38). The resulting gene-cell UMI count matrices of all samples  
395 were ultimately concatenated into one matrix using the "cellranger aggr" pipeline.

### 396 **Data cleaning, normalization, feature selection, integration and scaling**

397 The concatenated gene-cell barcode matrix was imported into Seurat v3.1.0 for data preprocessing. To  
398 exclude genes likely detected from random noise, we filtered out genes with counts in fewer than 3 cells.  
399 To exclude poor-quality cells that might have resulted from doublets or other technical noise, we filtered  
400 cell outliers ( $>$  third quartile +  $1.5 \times$  interquartile range or  $<$  first quartile -  $1.5 \times$  interquartile range) based  
401 on the number of expressed genes, the sum of UMI counts and the proportion of mitochondrial genes. To  
402 further remove doublets, we filtered out cells based on the predictions by Scrublet (Wolock et al., 2019).  
403 In addition, cells enriched in hemoglobin gene expression were considered red blood cells and were  
404 excluded from further analyses. The sum of the UMI counts for each cell was normalized to 10,000 and  
405 log-transformed. For each sample, 2,000 features (genes) were selected using the "FindVariableFeatures"  
406 function of Seurat under the default settings. To correct for potential batch effects and identify shared cell  
407 states across datasets, we integrated all the datasets via canonical correlation analysis (CCA)

408 implemented in Seurat. To mitigate the effects of uninteresting sources of variation (e.g., cell cycle), we  
409 regressed out the mitochondrial gene proportion, UMI count, S phase score and G2M phase score  
410 (calculated by the “CellCycleScoring” function) with linear models using the “ScaleData” function. Finally,  
411 the data were centered for each gene by subtracting the average expression of that gene across all cells,  
412 and were scaled by dividing the centered expression by the standard deviation.

### 413 **Dimensional reduction and clustering**

414 The expression of the selected genes was subjected to linear dimensional reduction through principal  
415 component analysis (PCA). The first 30 components of the PCA were used to compute a neighborhood  
416 graph of the cells. The neighborhood graph was ultimately embedded in two-dimensional space using  
417 the nonlinear dimensional reduction method of uniform manifold approximation and projection (UMAP)  
418 (Becht et al., 2019). The neighborhood graph of cells was clustered using Louvain clustering  
419 (resolution=0.6) (Blondel et al., 2008).

### 420 **Differential expression and functional enrichment analysis**

421 Differentially expressed genes between two groups of cells were detected with the likelihood-ratio test  
422 (test.use: “bimod”) implemented in the “FindMarkers” function of Seurat. The significance threshold was  
423 set to an adjusted p-value < 0.05 and a log2-fold change > 0.25. Functional enrichment analyses of a list  
424 of genes were performed using ClueGO (Bindea et al., 2009) with an adjusted p-value threshold of 0.05.

### 425 **Gene set enrichment analysis**

426 All the expressed genes were preranked by Signal2Noise (the difference in means between CASE and  
427 CTRL scaled by the standard deviation). Then, the ranked gene list was imported into the software GSEA  
428 (version: 4.0.1) (Subramanian et al., 2005). An FDR q-value < 0.05 was considered to be statistically  
429 significant. Precompiled gene sets, i.e., REACTOME pathways in MSigDB (version: 7.0) (Liberzon et al.,  
430 2015) were used in this analysis. The results were visualized using the EnrichmentMap plugin of  
431 Cytoscape (version: 3.7.0).



## 432 **Differential proportion analysis**

433 To determine whether the change in the cell proportion of a specific lineage or cluster compared with the  
434 control was expected by chance, we performed a permutation-based statistical test (differential proportion  
435 analysis; DPA) as described previously (Farbehi et al., 2019). A Bonferroni-corrected p-value < 0.05 was  
436 considered to be statistically significant.

## 437 **Differential regulatory network analysis based on single-cell transcriptomes**

438 Gene regulatory networks were constructed from single-cell datasets and compared using the method  
439 implemented in bigScale2 (Iacono et al., 2019). Briefly, gene regulatory networks for the CASE and CTRL  
440 were inferred with the 'compute.network' function (clustering='direct', quantile.p = 0.90) separately. Genes  
441 encoding ribosomal proteins or mitochondrial proteins were excluded from this analysis. Then, the  
442 number of edges was homogenized throughout the obtained networks using the 'homogenize.networks'  
443 function. Finally, changes in node centralities (the relative importance of genes in the network) in the  
444 CASE compared to the CTRL group were identified using the 'compare centrality' function. Four  
445 measures of centrality, namely degree, betweenness, closeness and pagerank, were considered. The  
446 networks were ultimately visualized with Cytoscape (version: 3.7.0).

## 447 **Subpopulation-specific regulon analysis**

448 To identify the master regulators driving the cellular heterogeneity among subpopulations, we performed  
449 regulon analysis using the R package SCENIC (Aibar et al., 2017). Briefly, coexpression modules were  
450 identified, which included a set of genes coexpressed with regulators. Then, only the modules with  
451 significant motif enrichment of the regulators were retained, which were referred to as regulons. The  
452 activity of each regulon was ultimately scored for each cell. Subpopulation-specific regulons could be  
453 found based on the average regulon activity scores of cells in the subpopulation.

## 454 **Cell-cell communication analysis based on single-cell transcriptomes**

455 To analyze cell-cell communication based on single-cell transcriptomic datasets, we used CellPhoneDB  
456 2.0 (Efremova et al., 2019), which contains a curated repository of ligand- receptor interactions and a

457 statistical framework for inferring lineage-specific interactions. Briefly, potential ligand-receptor  
458 interactions were established based on the expression of a receptor by one lineage and a ligand by  
459 another. Only ligands and receptors expressed in greater than 10% of the cells in any given lineage were  
460 considered. The labels of all cells were randomly permuted 1000 times and the means of the average  
461 ligand-receptor expression in the interacting lineages were calculated, thus generating a null distribution  
462 for each ligand-receptor pair in each pairwise comparison between lineages. Ultimately, a p-value for the  
463 likelihood of lineage specificity for a given ligand-receptor pair was obtained.

## 464 **Author contributions**

465 X. Liu analyzed the data, interpreted the results and wrote the manuscript. M. Y. and Q. X. performed  
466 tissue dissociation and library preparation, and participated in drafting the manuscript. Z. L., J. C., J. H.  
467 and N. Y. prepared the samples and contributed to the result interpretation. X. Long and Z. Z. conceived  
468 the project. W. C. participated in the design of the project.

## 469 **Acknowledgments**

470 This work was supported by the grants from the Natural Science Foundation of China (81870229,  
471 81900282) and the Chinese Academy of Medical Sciences Initiative for Innovative Medicine Grant (2016-  
472 I2M-1-016).

## 473 **Reference**

- 474 Aibar, S., González-Blas, C.B., Moerman, T., Huynh-Thu, V.A., Imrichova, H., Hulselmans, G., Rambow, F.,  
475 Marine, J.C., Geurts, P., Aerts, J., et al. (2017). SCENIC: Single-cell regulatory network inference and  
476 clustering. *Nat. Methods* 14, 1083–1086.
- 477 Aschen, S., Zampell, J.C., Elhadad, S., Weitman, E., De Brot, M., and Mehrara, B.J. (2012). Regulation of  
478 adipogenesis by lymphatic fluid stasis: Part II. Expression of adipose differentiation genes. *Plast. Reconstr.*  
479 *Surg.* 129, 838–847.

- 480 Baer, P.C. (2014). Adipose-derived mesenchymal stromal/stem cells: An update on their phenotype in vivo  
481 and in vitro. *World J. Stem Cells* 6, 256–265.
- 482 Becht, E., McInnes, L., Healy, J., Dutertre, C.A., Kwok, I.W.H., Ng, L.G., Ginhoux, F., and Newell, E.W.  
483 (2019). Dimensionality reduction for visualizing single-cell data using UMAP. *Nat. Biotechnol.* 37, 38–47.
- 484 Bindea, G., Mlecnik, B., Hackl, H., Charoentong, P., Tosolini, M., Kirilovsky, A., Fridman, W.H., Pages, F.,  
485 Trajanoski, Z., and Galon, J. (2009). ClueGO: a Cytoscape plug-in to decipher functionally grouped gene  
486 ontology and pathway annotation networks. *Bioinformatics* 25, 1091–1093.
- 487 Blondel, V.D., Guillaume, J.L., Lambiotte, R., and Lefebvre, E. (2008). Fast unfolding of communities in large  
488 networks. *J. Stat. Mech. Theory Exp.* 2008.
- 489 Burl, R.B., Ramseyer, V.D., Rondini, E.A., Pique-Regi, R., Lee, Y.H., and Granneman, J.G. (2018).  
490 Deconstructing Adipogenesis Induced by beta3-Adrenergic Receptor Activation with Single-Cell Expression  
491 Profiling. *Cell Metab.* 28, 300-309 e4.
- 492 Cristancho, A.G., and Lazar, M.A. (2011). Forming functional fat: A growing understanding of adipocyte  
493 differentiation. *Nat. Rev. Mol. Cell Biol.* 12, 722–734.
- 494 Der, E., Suryawanshi, H., Morozov, P., Kustagi, M., Goilav, B., Ranabathou, S., Izmirly, P., Clancy, R.,  
495 Belmont, H.M., Koenigsberg, M., et al. (2019). Tubular cell and keratinocyte single-cell transcriptomics  
496 applied to lupus nephritis reveal type I IFN and fibrosis relevant pathways. *Nat. Immunol.* 20, 915–927.
- 497 DiSipio, T., Rye, S., Newman, B., and Hayes, S. (2013). Incidence of unilateral arm lymphoedema after  
498 breast cancer: A systematic review and meta-analysis. *Lancet Oncol.* 14, 500–515.
- 499 Dominici, M., Le Blanc, K., Mueller, I., Slaper-Cortenbach, I., Marini, F.C., Krause, D.S., Deans, R.J.,  
500 Keating, A., Prockop, D.J., and Horwitz, E.M. (2006). Minimal criteria for defining multipotent mesenchymal  
501 stromal cells. The International Society for Cellular Therapy position statement. *Cytotherapy* 8, 315–317.
- 502 Efremova, M., Vento-Tormo, M., Teichmann, S.A., and Vento-Tormo, R. (2019). CellPhoneDB v2.0: Inferring  
503 cell-cell communication from combined expression of multi-subunit receptor-ligand complexes. *BioRxiv*  
504 680926.
- 505 Emmert-Streib, F., and Glazko, G. V. (2011). Pathway Analysis of Expression Data: Deciphering Functional  
506 Building Blocks of Complex Diseases. *PLoS Comput. Biol.* 7, e1002053.

- 507 Farbehi, N., Patrick, R., Dorison, A., Xaymardan, M., Janbandhu, V., Wystub-Lis, K., Ho, J.W., Nordon, R.E.,  
508 and Harvey, R.P. (2019). Single-cell expression profiling reveals dynamic flux of cardiac stromal, vascular  
509 and immune cells in health and injury. *Elife* 8, e43882.
- 510 Folestad, E., Kunath, A., and Wågsäter, D. (2018). PDGF-C and PDGF-D signaling in vascular diseases and  
511 animal models. *Mol. Aspects Med.* 62, 1–11.
- 512 García-Cuesta, E.M., Santiago, C.A., Vallejo-Díaz, J., Juarranz, Y., Rodríguez-Frade, J.M., and Mellado, M.  
513 (2019). The Role of the CXCL12/CXCR4/ACKR3 Axis in Autoimmune Diseases. *Front. Endocrinol.*  
514 (Lausanne). 10, 585.
- 515 Gimble, J.M., Katz, A.J., and Bunnell, B.A. (2007). Adipose-derived stem cells for regenerative medicine.  
516 *Circ. Res.* 100, 1249–1260.
- 517 Guerrero-Juarez, C.F., Dedhia, P.H., Jin, S., Ruiz-Vega, R., Ma, D., Liu, Y., Yamaga, K., Shestova, O., Gay,  
518 D.L., Yang, Z., et al. (2019). Single-cell analysis reveals fibroblast heterogeneity and myeloid-derived  
519 adipocyte progenitors in murine skin wounds. *Nat. Commun.* 10, 650.
- 520 Guo, X., Zhang, Y., Zheng, L., Zheng, C., Song, J., Zhang, Q., Kang, B., Liu, Z., Jin, L., Xing, R., et al.  
521 (2018). Global characterization of T cells in non-small-cell lung cancer by single-cell sequencing. *Nat. Med.*  
522 24, 978–985.
- 523 Holm, A., Heumann, T., and Augustin, H.G. (2018). Microvascular Mural Cell Organotypic Heterogeneity and  
524 Functional Plasticity. *Trends Cell Biol.* 28, 302–316.
- 525 Hu, Y., Wang, D., Zhai, K., and Tong, Z. (2017). Transcriptomic analysis reveals significant b lymphocyte  
526 suppression in corticosteroid-treated hosts with pneumocystis pneumonia. *Am. J. Respir. Cell Mol. Biol.* 56,  
527 322–331.
- 528 Hume, D.A., and MacDonald, K.P.A. (2012). Therapeutic applications of macrophage colony-stimulating  
529 factor-1 (CSF-1) and antagonists of CSF-1 receptor (CSF-1R) signaling. *Blood* 119, 1810–1820.
- 530 Iacono, G., Massoni-Badosa, R., and Heyn, H. (2019). Single-cell transcriptomics unveils gene regulatory  
531 network plasticity. *Genome Biol.* 20, 1–20.
- 532 Ioannidou, A., Goulielmaki, E., and Garinis, G.A. (2016). DNA damage: From chronic inflammation to age-  
533 related deterioration. *Front. Genet.* 7, 187.

- 534 Jablonski, K.A., Amici, S.A., Webb, L.M., Ruiz-Rosado, J.D.D., Popovich, P.G., Partida-Sanchez, S., and  
535 Guerau-De-arellano, M. (2015). Novel markers to delineate murine M1 and M2 macrophages. *PLoS One* 10,  
536 e0145342.
- 537 Januszyk, M., Wan, D.C., Li, S., Ph, D., Nelson, E.R., Longaker, M.T., and Gurtner, G.C. (2013). Molecular  
538 Analysis and Differentiation Capacity of Adipose-Derived Stem Cells from Lymphedema Tissue. *Plast.*  
539 *Reconstr. Surg.* 132, 580–589.
- 540 Kalucka, J., de Rooij, L.P.M.H., Goveia, J., Rohlenova, K., Dumas, S.J., Meta, E., Conchinha, N. V.,  
541 Taverna, F., Teuwen, L.A., Veys, K., et al. (2020). Single-Cell Transcriptome Atlas of Murine Endothelial  
542 Cells. *Cell* 180, 764-779.e20.
- 543 Kozhemyakina, E., Zhang, M., Ionescu, A., Ayturk, U.M., Ono, N., Kobayashi, A., Kronenberg, H., Warman,  
544 M.L., and Lassar, A.B. (2015). Identification of a Prg4-expressing articular cartilage progenitor cell population  
545 in mice. *Arthritis Rheumatol.* 67, 1261–1273.
- 546 Kulkarni, A., Anderson, A.G., Merullo, D.P., and Konopka, G. (2019). Beyond bulk: a review of single cell  
547 transcriptomics methodologies and applications. *Curr. Opin. Biotechnol.* 58, 129–136.
- 548 Lawenda, B.D., Mondry, T.E., and Johnstone, P.A.S. (2009). Lymphedema: A primer on the identification  
549 and management of a chronic condition in oncologic treatment. *CA. Cancer J. Clin.* 59, 8–24.
- 550 Li, Z., Li, D., Tsun, A., and Li, B. (2015). FOXP3+ regulatory T cells and their functional regulation. *Cell. Mol.*  
551 *Immunol.* 12, 558–565.
- 552 Liberzon, A., Birger, C., Thorvaldsdóttir, H., Ghandi, M., Mesirov, J.P., and Tamayo, P. (2015). The  
553 Molecular Signatures Database Hallmark Gene Set Collection. *Cell Syst.* 1, 417–425.
- 554 Lim, H.Y., Lim, S.Y., Tan, C.K., Thiam, C.H., Goh, C.C., Carbajo, D., Chew, S.H.S., See, P., Chakarov, S.,  
555 Wang, X.N., et al. (2018). Hyaluronan Receptor LYVE-1-Expressing Macrophages Maintain Arterial Tone  
556 through Hyaluronan-Mediated Regulation of Smooth Muscle Cell Collagen. *Immunity* 49, 326-341.e7.
- 557 Liu, M. hao, Li, Y., Han, L., Zhang, Y. yuan, Wang, D., Wang, Z. hao, Zhou, H. min, Song, M., Li, Y. hui,  
558 Tang, M. xiong, et al. (2017). Adipose-derived stem cells were impaired in restricting CD4+T cell proliferation  
559 and polarization in type 2 diabetic ApoE<sup>-/-</sup> mouse. *Mol. Immunol.* 87, 152–160.
- 560 Mehrara, B.J., and Greene, A.K. (2014). Lymphedema and obesity: Is there a link? *Plast. Reconstr. Surg.*

- 561 134, 154e-160e.
- 562 Merad, M., Sathe, P., Helft, J., Miller, J., and Mortha, A. (2013). The Dendritic Cell Lineage: Ontogeny and  
563 Function of Dendritic Cells and Their Subsets in the Steady State and the Inflamed Setting. *Annu. Rev.*  
564 *Immunol.* 31, 563–604.
- 565 Newman, B., Lose, F., Kedda, M.A., Francois, M., Ferguson, K., Janda, M., Yates, P., Spurdle, A.B., and  
566 Hayes, S.C. (2012). Possible genetic predisposition to lymphedema after breast cancer. *Lymphat. Res. Biol.*  
567 10, 2–13.
- 568 Rajbhandari, P., Thomas, B.J., Feng, A.C., Hong, C., Wang, J., Vergnes, L., Sallam, T., Wang, B., Sandhu,  
569 J., Seldin, M.M., et al. (2018). IL-10 Signaling Remodels Adipose Chromatin Architecture to Limit  
570 Thermogenesis and Energy Expenditure. *Cell* 172, 218-233.e17.
- 571 Ramakrishnan, V.M., and Boyd, N.L. (2018). The Adipose Stromal Vascular Fraction as a Complex Cellular  
572 Source for Tissue Engineering Applications. *Tissue Eng. - Part B Rev.* 24, 289–299.
- 573 Reily, C., Stewart, T.J., Renfrow, M.B., and Novak, J. (2019). Glycosylation in health and disease. *Nat. Rev.*  
574 *Nephrol.* 15, 346–366.
- 575 Reyfman, P.A., Walter, J.M., Joshi, N., Anekalla, K.R., McQuattie-Pimentel, A.C., Chiu, S., Fernandez, R.,  
576 Akbarpour, M., Chen, C.I., Ren, Z., et al. (2019). Single-cell transcriptomic analysis of human lung provides  
577 insights into the pathobiology of pulmonary fibrosis. *Am. J. Respir. Crit. Care Med.* 199, 1517–1536.
- 578 Ruttkay-Nedecky, B., Nejdli, L., Gumulec, J., Zitka, O., Masarik, M., Eckschlager, T., Stiborova, M., Adam, V.,  
579 and Kizek, R. (2013). The role of metallothionein in oxidative stress. *Int. J. Mol. Sci.* 14, 6044–6066.
- 580 Schwalie, P.C., Dong, H., Zachara, M., Russeil, J., Alpern, D., Akchiche, N., Caprara, C., Sun, W.,  
581 Schlaudraff, K.U., Soldati, G., et al. (2018). A stromal cell population that inhibits adipogenesis in mammalian  
582 fat depots. *Nature* 559, 103–108.
- 583 Shaitelman, S.F., Cromwell, K.D., Rasmussen, J.C., Stout, N.L., Armer, J.M., Lasinski, B.B., and Cormier,  
584 J.N. (2015). Recent progress in the treatment and prevention of cancer-related lymphedema. *CA. Cancer J.*  
585 *Clin.* 65, 55–81.
- 586 Singhal, S., Stadanlick, J., Annunziata, M.J., Rao, A.S., Bhojnagarwala, P.S., O'Brien, S., Moon, E.K.,  
587 Cantu, E., Danet-Desnoyers, G., Ra, H.J., et al. (2019). Human tumor-associated monocytes/macrophages

588 and their regulation of T cell responses in early-stage lung cancer. *Sci. Transl. Med.* *11*.

589 Subramanian, A., Tamayo, P., Mootha, V.K., Mukherjee, S., Ebert, B.L., Gillette, M.A., Paulovich, A.,  
590 Pomeroy, S.L., Golub, T.R., Lander, E.S., et al. (2005). Gene set enrichment analysis: A knowledge-based  
591 approach for interpreting genome-wide expression profiles. *Proc. Natl. Acad. Sci. U. S. A.* *102*, 15545–  
592 15550.

593 Suga, H., Matsumoto, D., Eto, H., Inoue, K., Aoi, N., Kato, H., Araki, J., and Yoshimura, K. (2009). Functional  
594 implications of CD34 expression in human adipose-derived stem/progenitor cells. *Stem Cells Dev.* *18*, 1201–  
595 1209.

596 Tashiro, K., Feng, J., Wu, S.H., Mashiko, T., Kanayama, K., Narushima, M., Uda, H., Miyamoto, S.,  
597 Koshima, I., and Yoshimura, K. (2017). Pathological changes of adipose tissue in secondary lymphoedema.  
598 *Br. J. Dermatol.* *177*, 158–167.

599 Tsolaki, E., and Bertazzo, S. (2019). Pathological mineralization: The potential of mineralomics. *Materials*  
600 (Basel). *12*.

601 Varol, C., Mildner, A., and Jung, S. (2015). Macrophages: Development and Tissue Specialization.

602 Vieira Braga, F.A., Kar, G., Berg, M., Carpaij, O.A., Polanski, K., Simon, L.M., Brouwer, S., Gomes, T.,  
603 Hesse, L., Jiang, J., et al. (2019). A cellular census of human lungs identifies novel cell states in health and  
604 in asthma. *Nat. Med.* *25*, 1153–1163.

605 Vijay, J., Gauthier, M.F., Biswell, R.L., Louiselle, D.A., Johnston, J.J., Cheung, W.A., Belden, B.,  
606 Pramatarova, A., Biertho, L., Gibson, M., et al. (2020). Single-cell analysis of human adipose tissue identifies  
607 depot- and disease-specific cell types. *Nat. Metab.* *2*, 97–109.

608 Visser, J., Van Geel, M., Cornelissen, A.J.M., Van Der Hulst, R.R.W.J., and Qiu, S.S. (2019). Breast Cancer-  
609 Related Lymphedema and Genetic Predisposition: A Systematic Review of the Literature. *Lymphat. Res.*  
610 *Biol.* *17*, 288–293.

611 Wang, Z., Kong, D., Li, Y., and Sarkar, F. (2009). PDGF-D Signaling: A Novel Target in Cancer Therapy.  
612 *Curr. Drug Targets* *10*, 38–41.

613 Wolock, S.L., Lopez, R., and Klein, A.M. (2019). Scrublet: computational identification of cell doublets in  
614 single-Cell transcriptomic data. *Cell Syst.* *8*, 281-291.e9.

- 615 Xiang, Q., Xu, F., Li, Y., Liu, X., Chen, Q., Huang, J., Yu, N., Zeng, Z., Yuan, M., Zhang, Q., et al. (2020).  
616 Transcriptome analysis and functional identification of adipose-derived mesenchymal stem cells in  
617 secondary lymphedema. *Gland Surg.* 9, 558–574.
- 618 Xu, Y., Xu, Q.H., Ni, S.J., Liu, F., Cai, G.X., Wu, F., Ye, X., Meng, X., Mougin, B., Cai, S.J., et al. (2011).  
619 Decrease in Natural Killer cell associated gene expression as a major characteristic of the immune status in  
620 the bloodstream of colorectal cancer patients. *Cancer Biol. Ther.* 11, 188–195.
- 621 Yang, L., Wang, J., Yang, J., Schamber, R., Hu, N., Nair, S., Xiong, L., and Ren, J. (2015). Antioxidant  
622 metallothionein alleviates endoplasmic reticulum stress-induced myocardial apoptosis and contractile  
623 dysfunction. *Free Radic. Res.* 49, 1187–1198.
- 624 Zampell, J.C., Yan, A., Elhadad, S., Avraham, T., Weitman, E., and Mehrara, B.J. (2012a). CD4+ Cells  
625 Regulate Fibrosis and Lymphangiogenesis in Response to Lymphatic Fluid Stasis. *PLoS One* 7, e49940.
- 626 Zampell, J.C., Aschen, S., Weitman, E.S., Yan, A., Elhadad, S., De Brot, M., and Mehrara, B.J. (2012b).  
627 Regulation of adipogenesis by lymphatic fluid stasis: Part I. Adipogenesis, fibrosis, and inflammation. *Plast.*  
628 *Reconstr. Surg.* 129, 825–834.
- 629 Zheng, G.X.Y., Terry, J.M., Belgrader, P., Ryvkin, P., Bent, Z.W., Wilson, R., Ziraldo, S.B., Wheeler, T.D.,  
630 McDermott, G.P., Zhu, J., et al. (2017). Massively parallel digital transcriptional profiling of single cells. *Nat.*  
631 *Commun.* 8, 14049.
- 632



## 633 **Figure and figure captions**

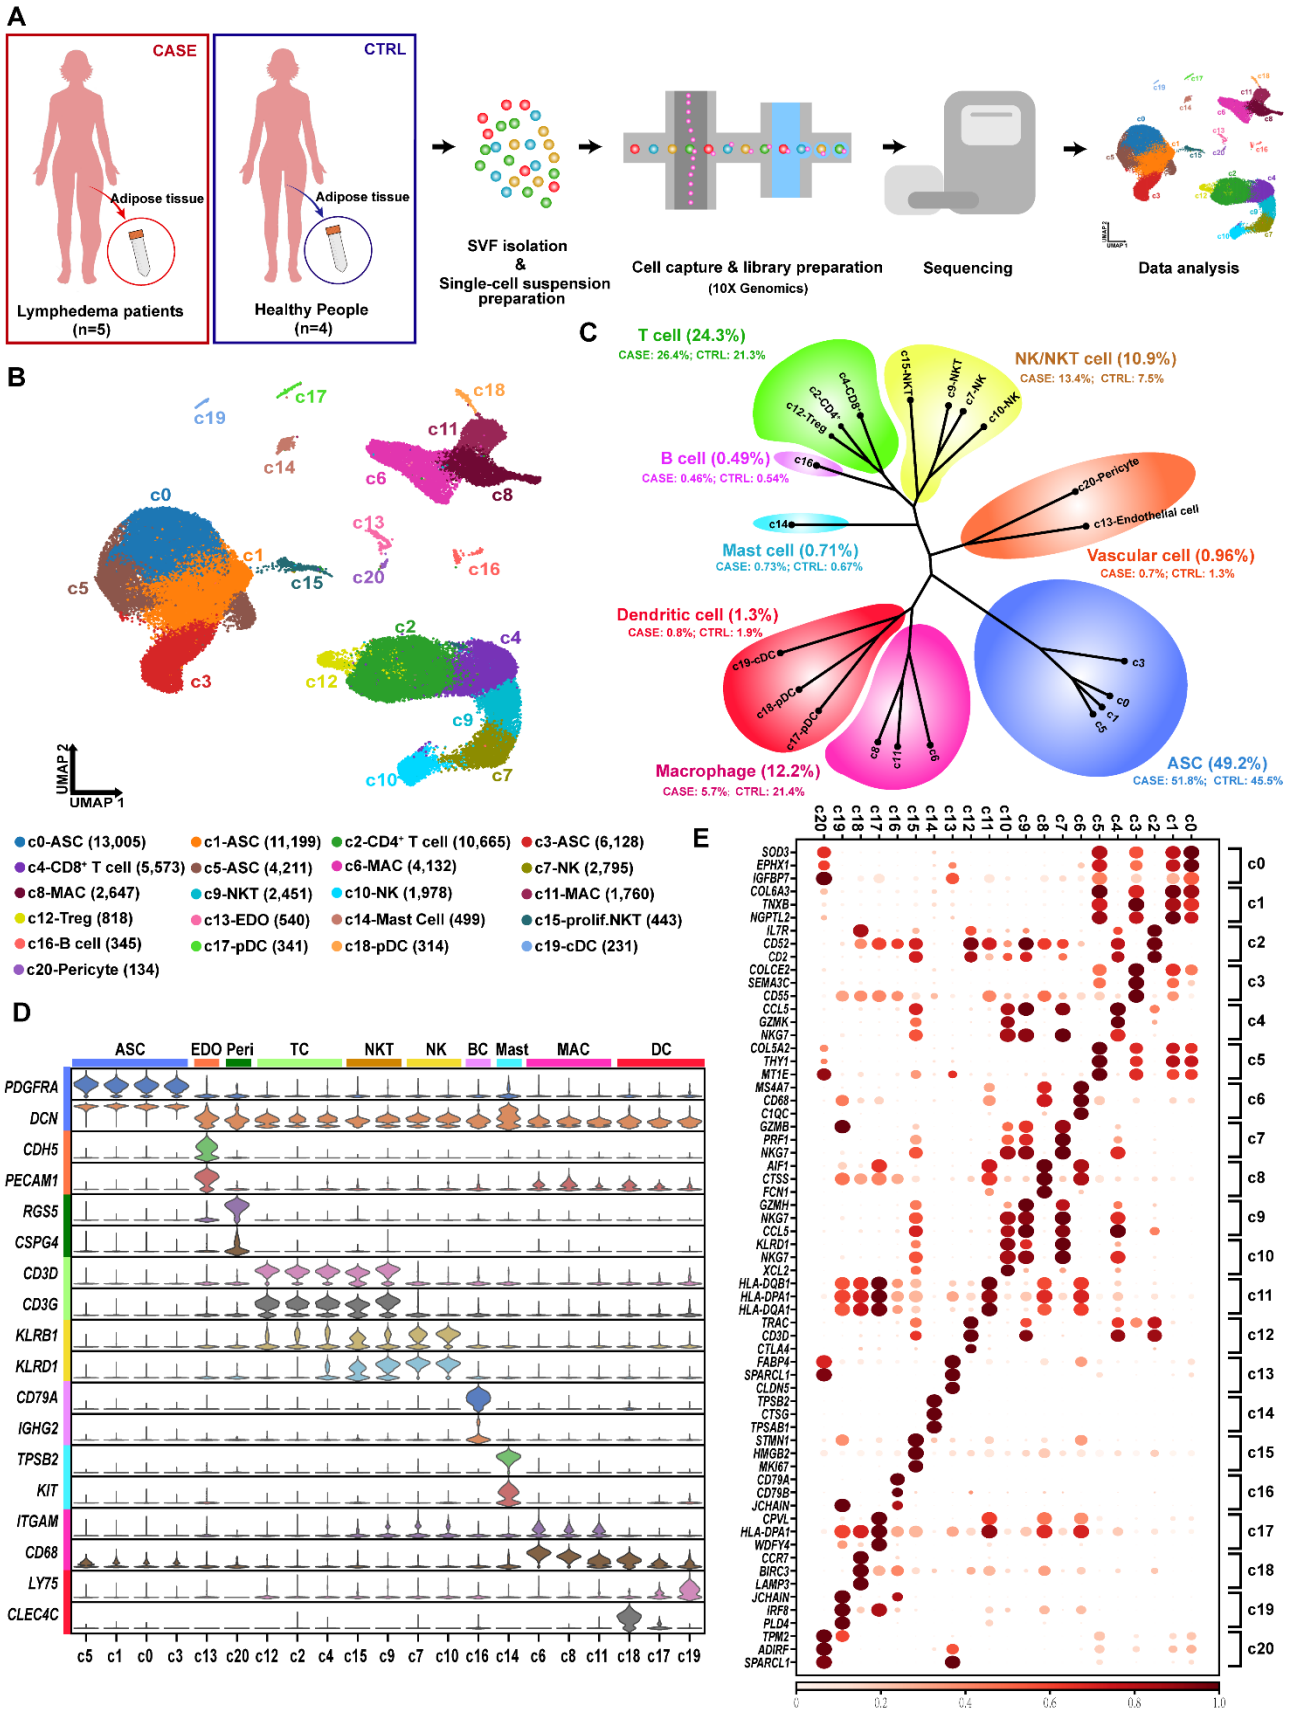

635 **Figure 1. Single-cell RNA-seq reveals cellular diversity and heterogeneity of the SVF of adipose**  
636 **tissue in patients with cancer-related lymphedema. (A)** Schematic representation of the experimental  
637 procedure. Five patients with cancer-related lymphedema (the CASE group) and four healthy people  
638 were recruited in this study. Liposuction specimens from the thighs were collected during surgery. **(B)**  
639 Unbiased clustering of 70,209 cells revealed 21 cellular clusters. Clusters are distinguished by different  
640 colors. The number in parentheses represents the cell count. **(C)** Hierarchical clustering of the clusters  
641 based on the average expression of the 2,000 most variable genes. **(D)** Expression of the established  
642 marker genes for each lineage in each cluster. **(E)** Representative molecular signatures for each cell  
643 cluster. The area of the circles indicates the proportion of cells expressing the gene, and the color intensity  
644 reflects the expression intensity. ASC: adipose-derived stromal/stem/progenitor cell; cDC: conventional  
645 dendritic cell; EDO: endothelial cell; MAC: macrophage; NK: natural killer cell; NKT: natural killer T cell;  
646 prolif.NKT: proliferative nature killer T cell; pDC: plasmacytoid dendritic cell.

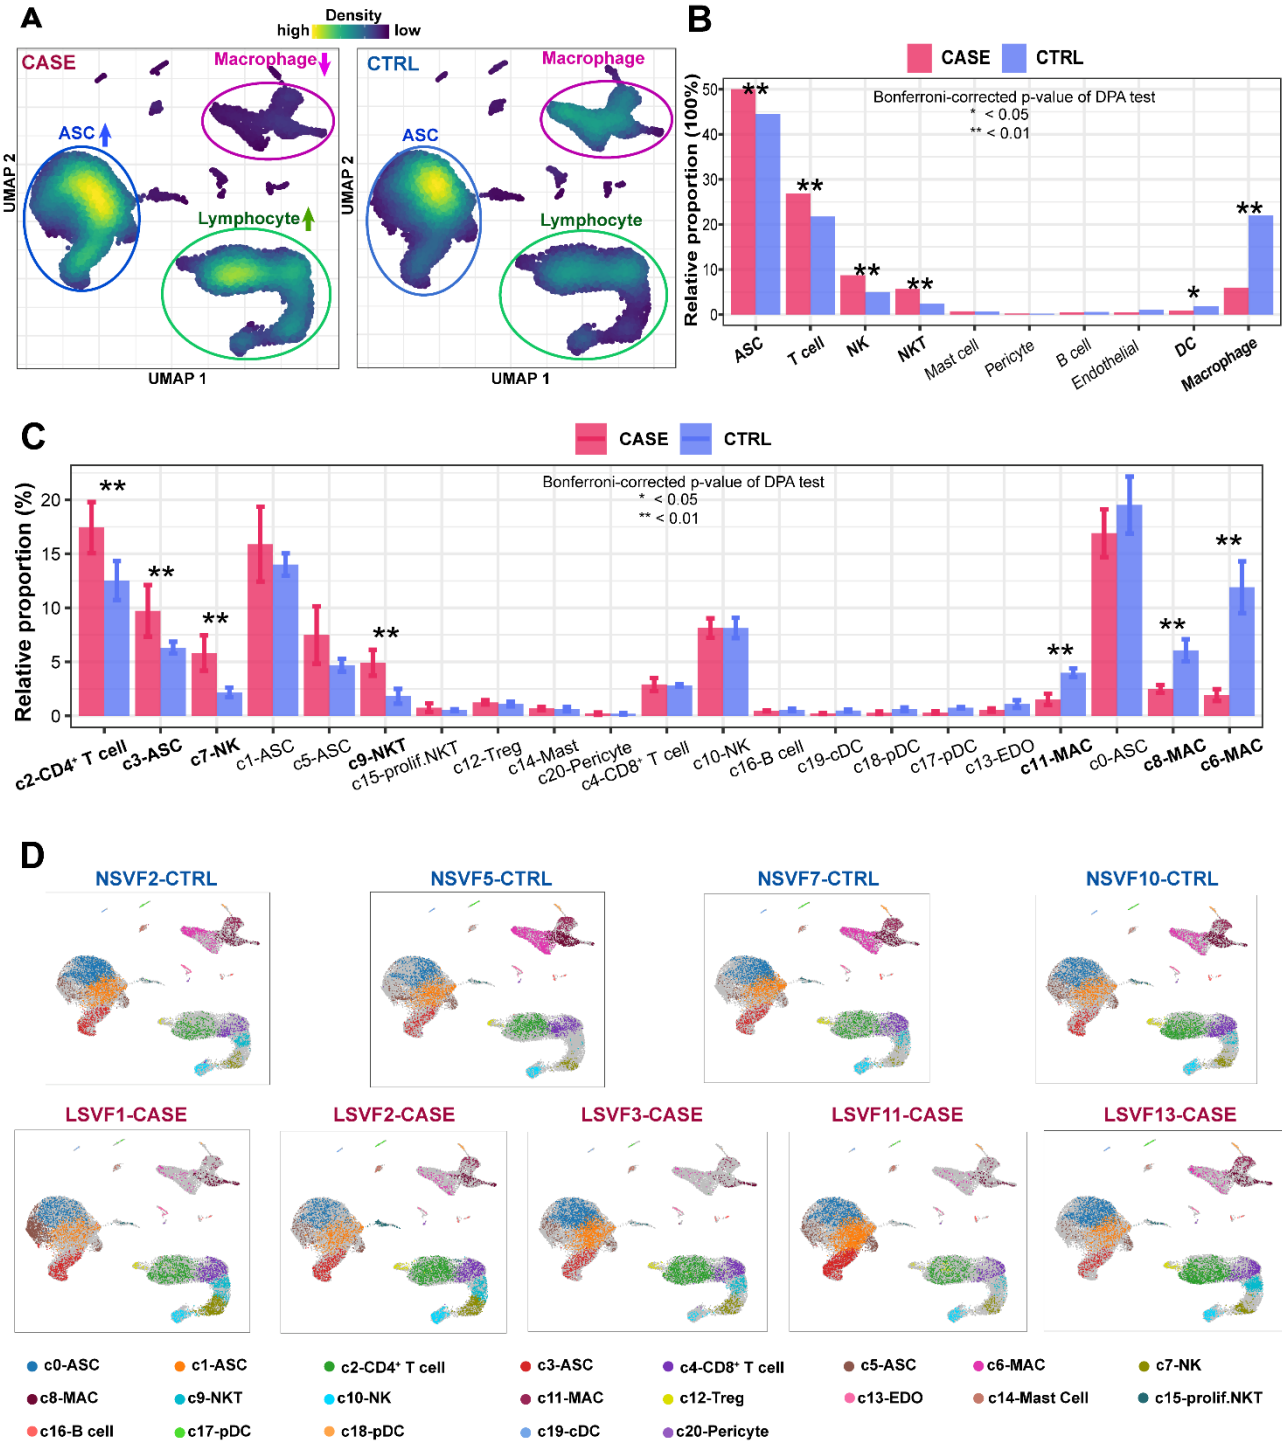

648 **Figure 2. Differential proportional analysis reveals significantly expanded or contracted cell**  
649 **lineages associated with cancer-related lymphedema. (A)** Visualization of the cellular density reveals  
650 dramatic changes in the proportions of multiple cell lineages in CASE versus CTRL. Cells were randomly  
651 sampled for equal numbers in the CASE (n= 28,935) and CTRL (n= 28,935) groups in this analysis. **(B)**  
652 Significantly expanded or contracted cell lineages. **(C)** Significantly expanded or contracted cell clusters.  
653 **(D)** The distribution of cells for each cluster in each individual. In B and C, a permutation-based statistical  
654 test (differential proportion analysis; DPA) was performed. A Bonferroni-corrected p-value < 0.05 was  
655 considered to be statistically significant.

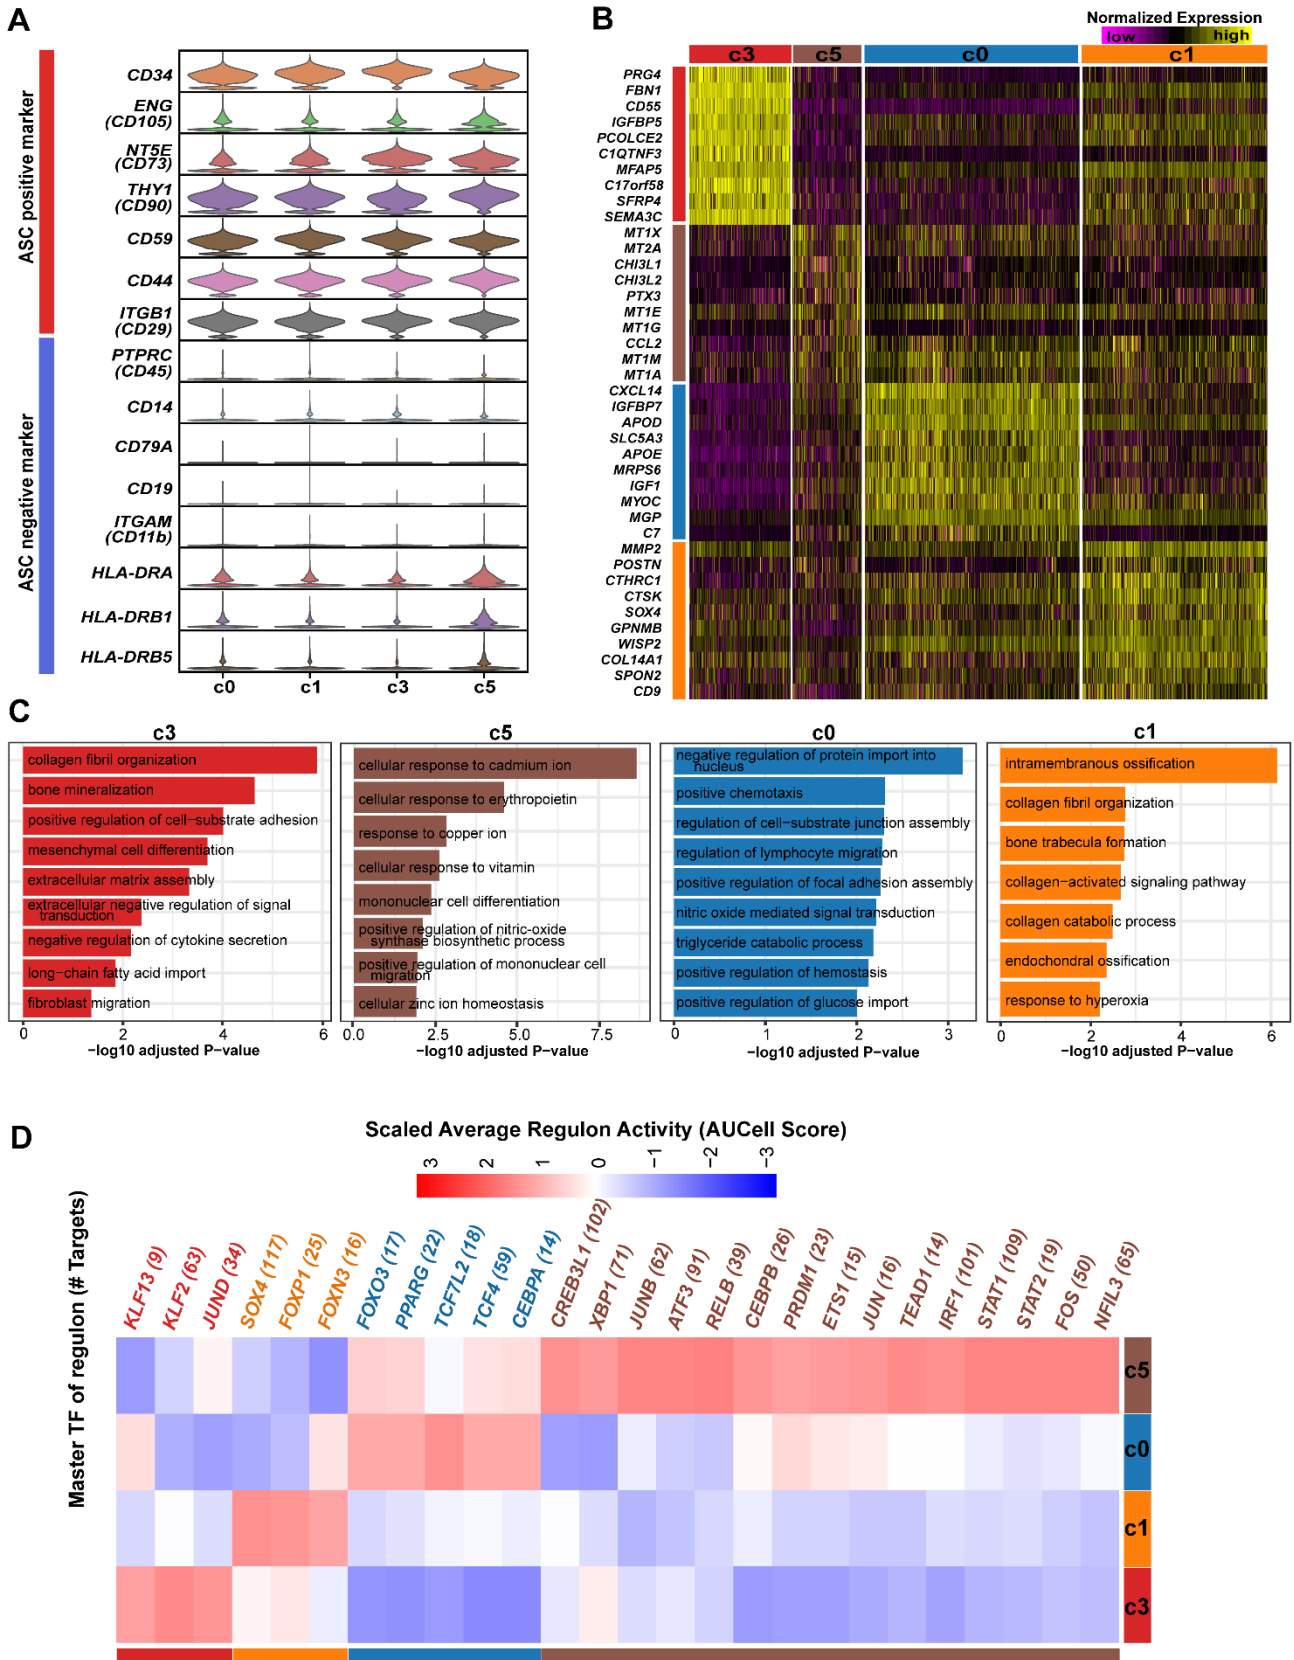

657 **Figure 3. Heterogeneity of ASCs in adipose tissue revealed by single-cell analysis. (A)** The  
658 expression of marker genes normally used for identifying freshly isolated or cultured ASCs. **(B)** Distinct  
659 expression profiles displayed by the four subpopulations of ASCs. **(C)** Enriched Gene Ontology terms of  
660 the molecular signature for each subpopulation. Adjusted p-value < 0.05. **(D)** Subpopulation-specific  
661 regulons of each subpopulation revealed by SCENIC analysis.

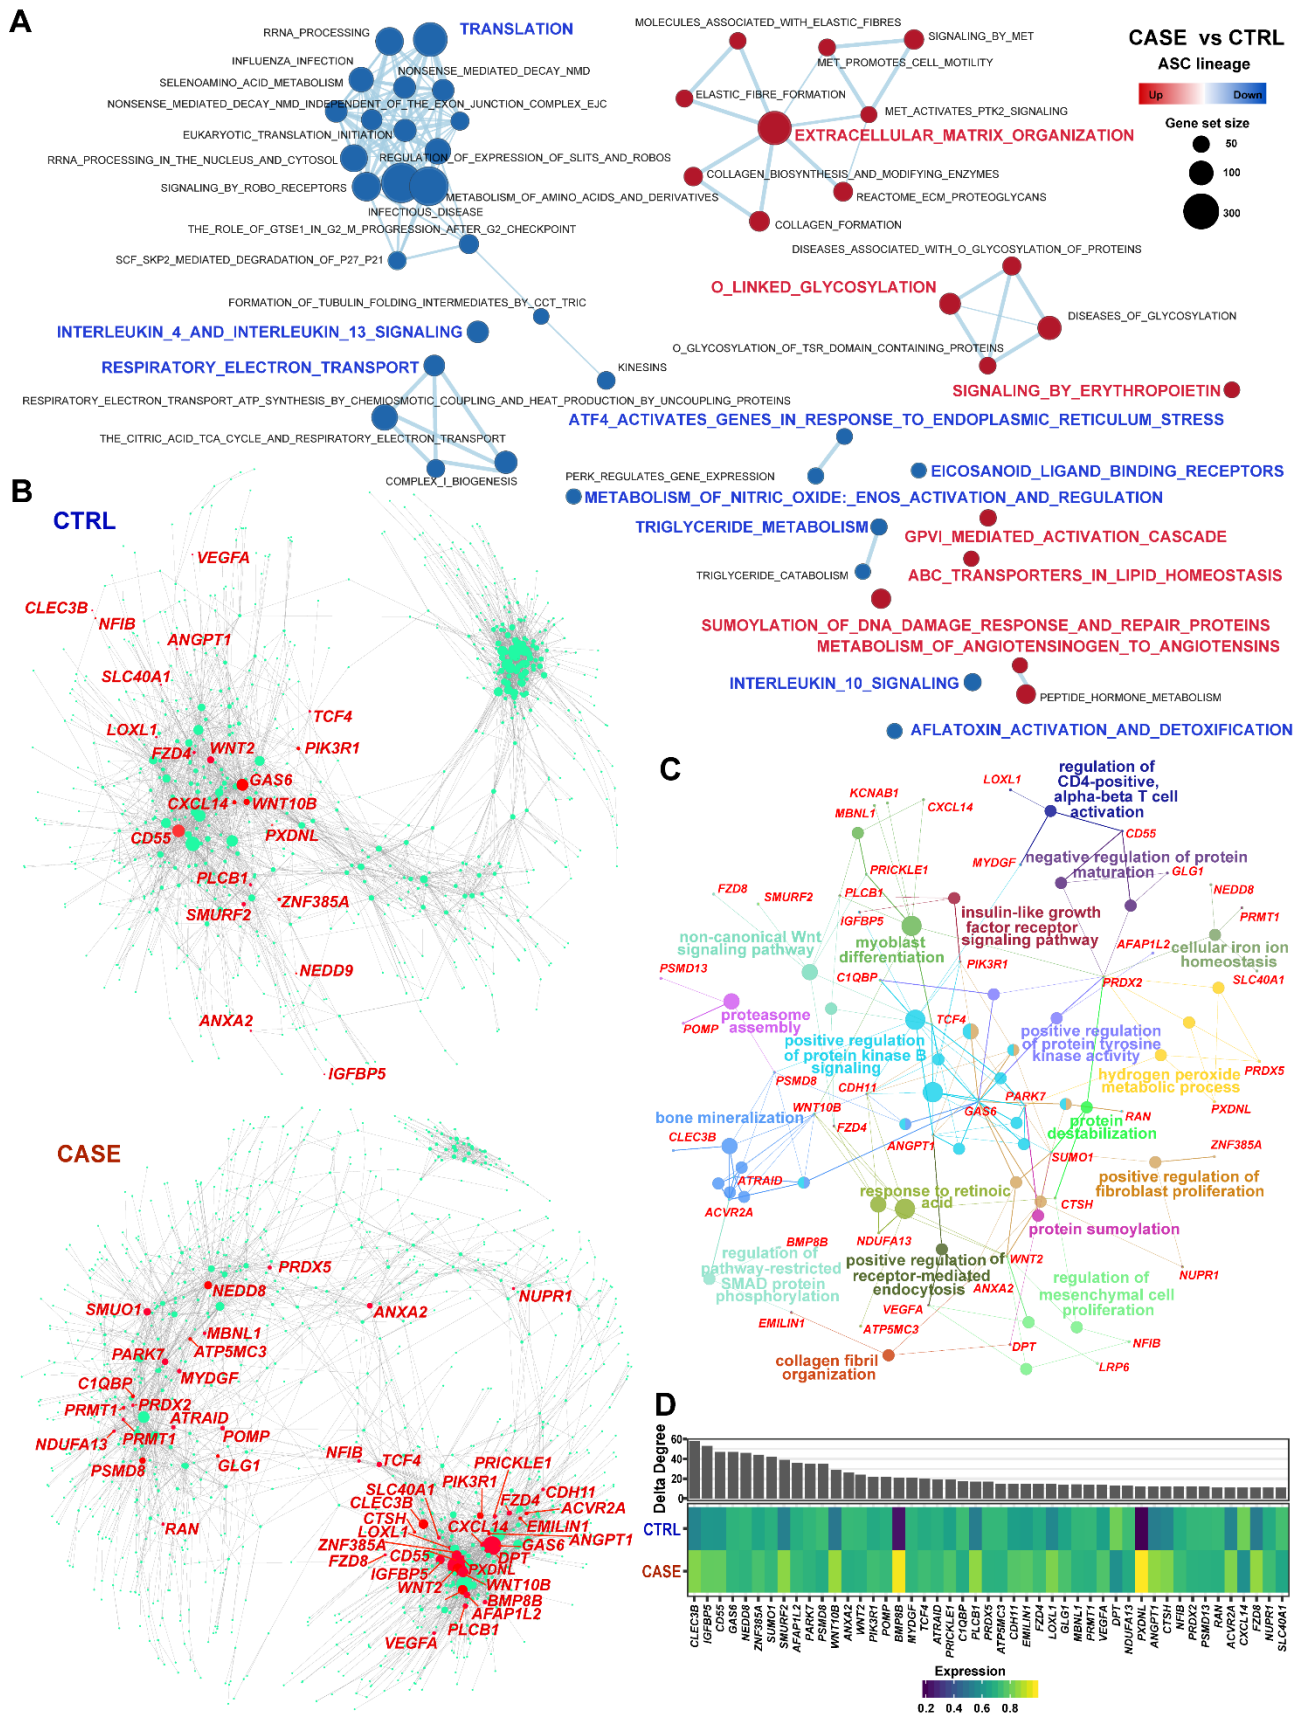



663 **Figure 4. Dysregulated genes and pathways of ASCs in adipose tissue derived from cancer-**  
664 **related lymphedema. (A)** Gene set enrichment analysis reveals up- and down-regulated pathways of  
665 ASCs in CASE versus CTRL. An FDR q-value < 0.05 was considered to be statistically significant. **(B)**  
666 Comparative analysis of the gene regulatory networks of ASCs between the CASE (lower panel) and  
667 CTRL (upper panel) groups reveals dysregulated genes in ASCs. The node size reflects the degree  
668 centrality. The representative genes dysregulated in CASE ranked by delta degree are labeled in red. **(C)**  
669 Network view of the functional enrichment for the dysregulated genes shown in B. Small dots denote  
670 genes and large nodes represent Gene Ontology terms. The node size represents the number of genes  
671 associated with the Gene Ontology term. Adjusted p-value < 0.05. **(D)** Delta degree centrality (upper  
672 panel) and average expression across cells in CASE and CTRL (lower panel).

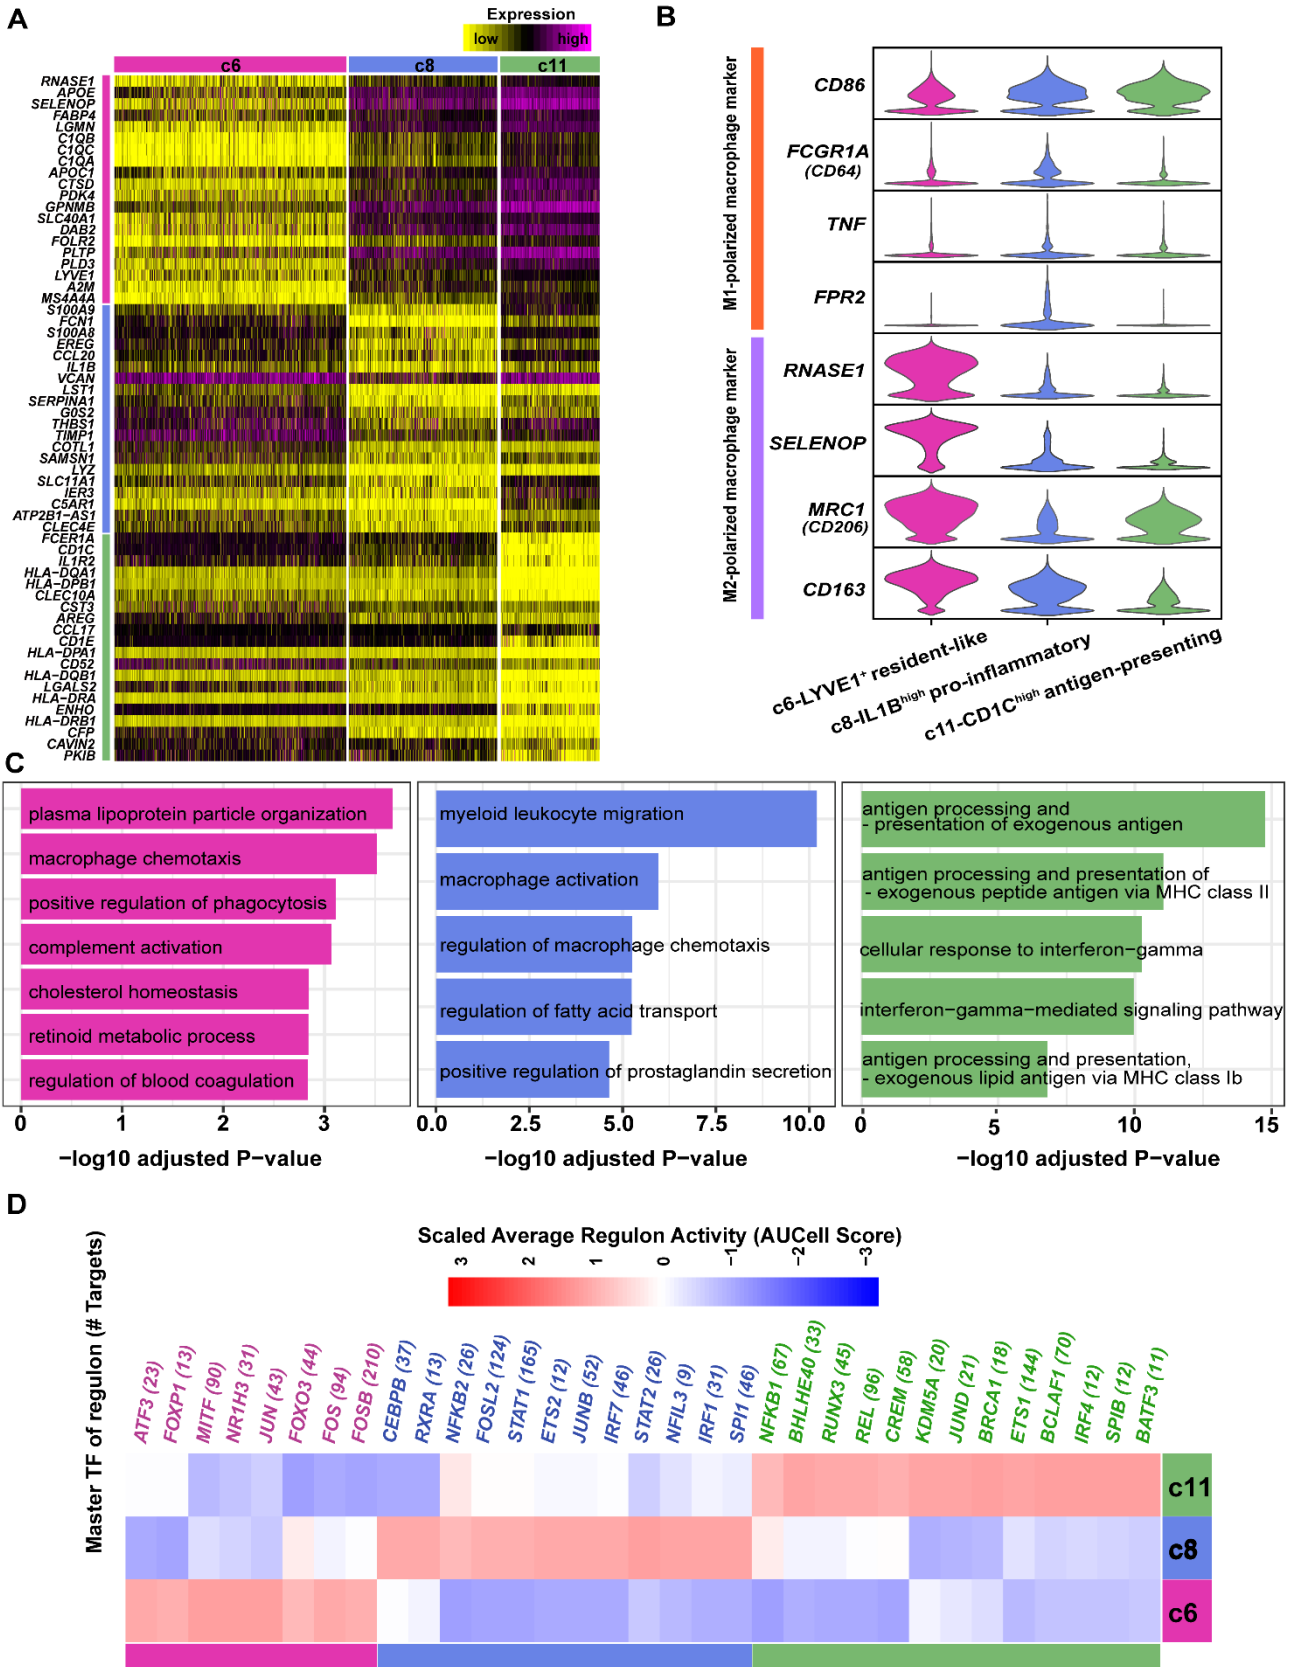

673

674 **Figure 5. The phenotypic differences among the three lymphedema-associated macrophage**  
675 **subpopulations. (A)** Distinct expression profiles of the three macrophage subpopulations. **(B)**  
676 Expression of M1- or M2-polarized macrophage markers in the three subpopulations. **(C)** Enriched Gene  
677 Ontology terms of the molecular signature for each subpopulation. Adjusted p-value < 0.05. **(D)**  
678 Subpopulation-specific regulons of each subpopulation revealed by SCENIC analysis.

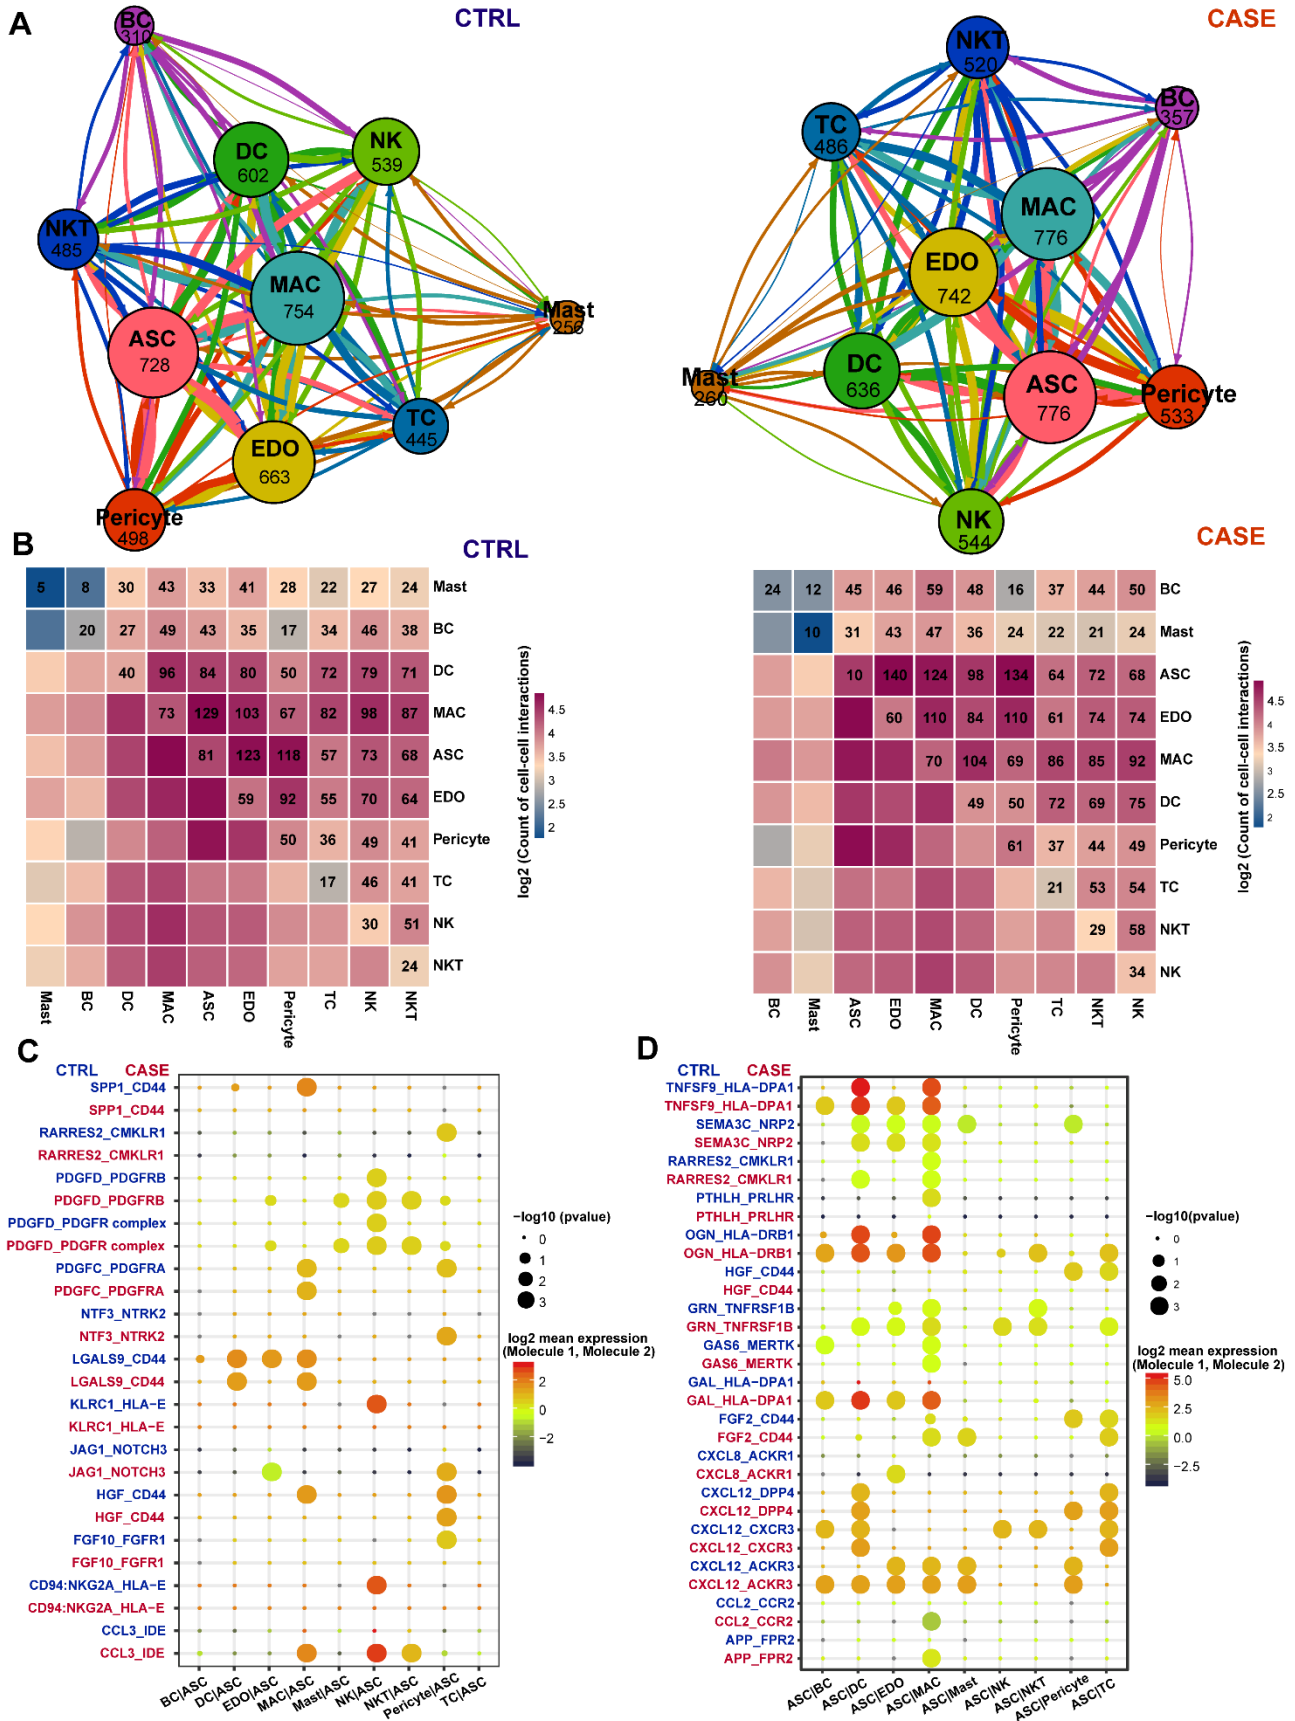

680 **Figure 6. Cell-cell communication analysis reveals a perivascular ligand-receptor interaction**  
 681 **module and communication changes for ASCs in cancer-related lymphedema. (A)** Interlineage  
 682 communication networks in adipose tissue from patients with lymphedema (CASE; right panel) and  
 683 healthy people (CTRL; left panel). The total number of communications is shown for each cell lineage.  
 684 The line color indicates that the ligands are broadcast by the cell lineage in the same color. The line  
 685 thickness is proportional to the number of broadcast ligands. **(B)** Heatmap shows the number of  
 686 communications between any two lineages in the CASE (right panel) and CTRL (left panel) groups. **(C)**  
 687 The ligand-receptor pairs that were shown significant changes in specificity between any one of the non-  
 688 ASC lineages and ASCs in CASE versus CTRL. ASCs express receptors and receive ligand signals from  
 689 other lineages. The dot size reflects the p-value of the permutation tests for lineage-specificity. The dot  
 690 color denotes the mean of the average ligand-receptor expression in the interacting lineages. **(D)** The  
 691 ligand-receptor pairs that were shown significant changes in specificity between ASCs and any one of  
 692 the non-ASC lineages in CASE versus CTRL. ASCs express ligands and broadcast ligand signals for  
 693 other lineages. ASC: adipose-derived stromal/stem/progenitor cell; BC: B cell; DC: dendritic cell; EDO:  
 694 endothelial cell; MAC: macrophage; NK: natural killer cell; NKT: natural killer T cell; TC: T cell.

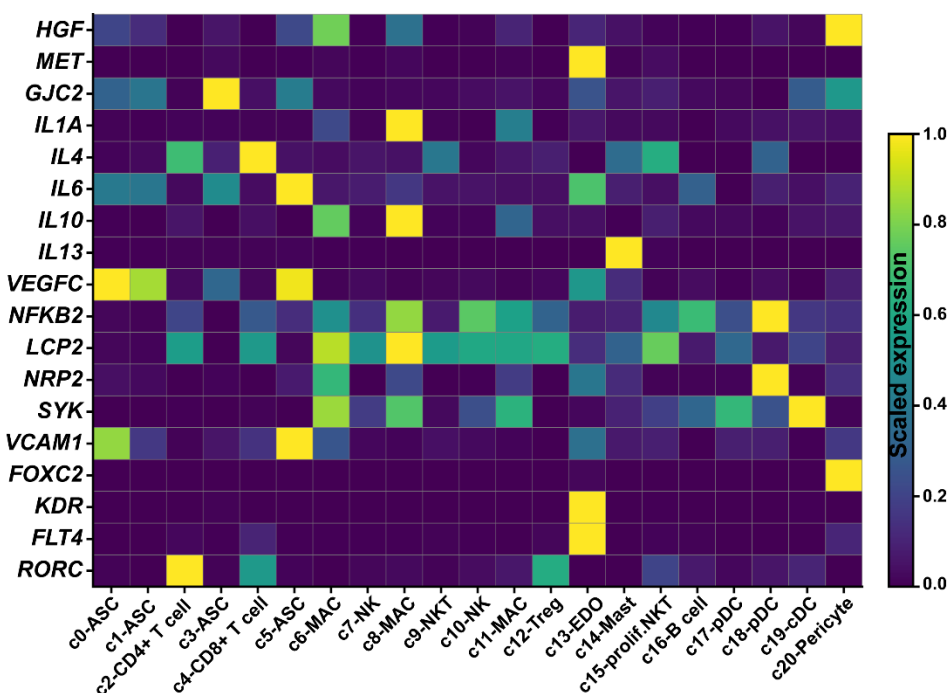

696 **Figure 7. The expression of 18 previously reported candidate genes predisposing to cancer-**  
697 **related lymphedema in each cell cluster.**

698

## 699 Supplemental Materials

700 **Figure S1. Expression of markers for CD4<sup>+</sup> T cells, Treg cells, CD8<sup>+</sup> T cells, proliferation and**  
701 **cytotoxicity in the clusters of T cells and NKT cells.**

702 **Figure S2. The distribution of cycling scores of ASCs in CASE and CTRL. The cycling score is**  
703 **defined as the sum of the expression of a group of cycling genes.**

704 **Figure S3. Decreased adipogenesis and increased osteogenesis of ASCs in lymphedema. (A)** The  
705 expression of *PPARG*, the master regulator of adipogenesis, was significantly decreased in CASE  
706 compared to CTRL. **(B)** The expression of *CEBPA*, another key regulator of adipogenesis, was  
707 significantly decreased in CASE compared to CTRL. **(C)** Decreased adipogenesis in CASE compared to  
708 CTRL. The adipogenesis score is defined as the sum of the expression of a curated list of genes involved  
709 in adipogenesis, including *ACACA*, *ANGPTL4*, *APOE*, *CD36*, *CEBPA*, *CEBPB*, *CEBPD*, *FASN*, *INSR*,  
710 *PPARG*, *SREBF1*, *IGF1*, *PLIN2*, *ADIPOQ*, *AOC3*, *AQP7*, *CITED1*, *FABP4*, *LEP*, *LPL*, *PCK1*, *SCD*,  
711 *SLC27A1*, *SLC2A4*, *SLCO2A1* and *UCP1*. **(D)** Increased osteogenesis in CASE compared to CTRL. The  
712 osteogenesis score is defined as the sum of the expression of a curated list of genes involved in  
713 osteogenesis, including *BMP2*, *COL11A1*, *COL9A2*, *COMP*, *FGFR3*, *HAPLN1*, *IHH*, *PTCH1*, *SOX5*,  
714 *SOX6*, *SOX9*, *TNFSF11*, *WNT11*, *WNT4*, *ACAN*, *BMP7*, *CD151*, *COL10A1*, *COL2A1*, *COL4A1*, *COL9A3*,  
715 *DMP1*, *EPYC*, *IBSP*, *MEF2C*, *MMP3*, *PAPLN*, *PRG4*, *RUNX3*, and *MIA*.

716 **Figure S4. ASCs are the predominant source of the macrophage colony stimulating factor CSF1.**  
717 **(A)** ASCs predominately express *CSF1* (left panel) and macrophages express the receptor *CSF1R* (right  
718 panel). **(B)** The expression of *CSF1* in ASCs (left panel) and *CSF1R* in macrophages (right panel) in  
719 diseased and healthy states.

720 **Table S1. Clinical information of the subjects and sequencing quality metrics of the samples.**

721 **Table S2. Molecular signature for each of the 21 cellular clusters.**

722 **Table S3. Molecular signature for each subpopulation of ASCs.** The molecular signature was  
723 obtained by differential expression analysis between one subpopulation and the others.

724 **Table S4. ASC subpopulation-specific regulons and their targets revealed by SCENIC analysis.**

725 **Table S5. Dysregulated pathways of ASCs in cancer-related lymphedema revealed by gene set**  
726 **enrichment analysis.**

727 **Table S6. Results of node centrality comparisons between the gene regulatory networks of the**  
728 **ASCs in CASE and CTRL.**

729 **Table S7. Molecular signature for each subpopulation of macrophages.** The molecular signature  
730 was obtained by differential expression analysis between one subpopulation and the others.

731 **Table S8. Macrophage subpopulation-specific regulons and their targets revealed by SCENIC**  
732 **analysis.**

733 **Table S9. Statistical inference of receptor-ligand specificity between all cell lineages with**  
734 **CellPhoneDB.**

735
